# Supplementary material for: Evidence for lactone formation during infrared multiple photon dissociation spectroscopy of bromoalkanoate doped salt clusters
Source: Royal Society of Chemistry journal article supplement (doi:10.1039/d0cp00272k), 2020-01-01
Supplement: d0cp00272k1.pdf [file d0cp00272k1.pdf]

## Supporting Information for the Manuscript:

### Evidence for Lactone Formation during Infrared Multiple Photon Dissociation Spectroscopy of Bromoalkanoate Doped Salt Clusters

*Nina K. Bersenkovitsch, Milan Ončák, Jakob Heller, Tobias F. Pascher, Christian van der Linde, and Martin K. Beyer*

*Institut für Ionenphysik und Angewandte Physik, Universität Innsbruck, Technikerstraße 25, 6020 Innsbruck, Austria*

*E-mail: milan.oncak@uibk.ac.at; martin.beyer@uibk.ac.at*

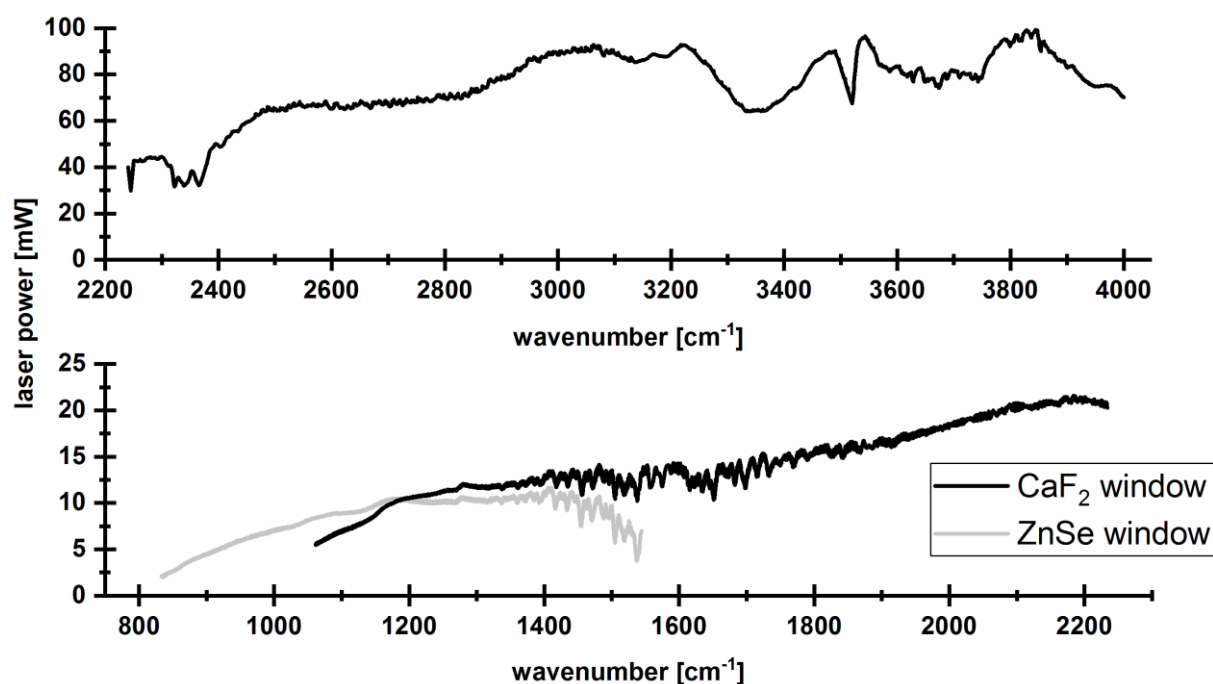

**Figure S1:** Laser energies for both tunable laser systems used. The spectra were measured at the distance from the laser to the ICR cell (3.65m). Due to the transmittance of the window in front of the ICR cell, two windows with different materials (CaF<sub>2</sub>, ZnSe) were used.

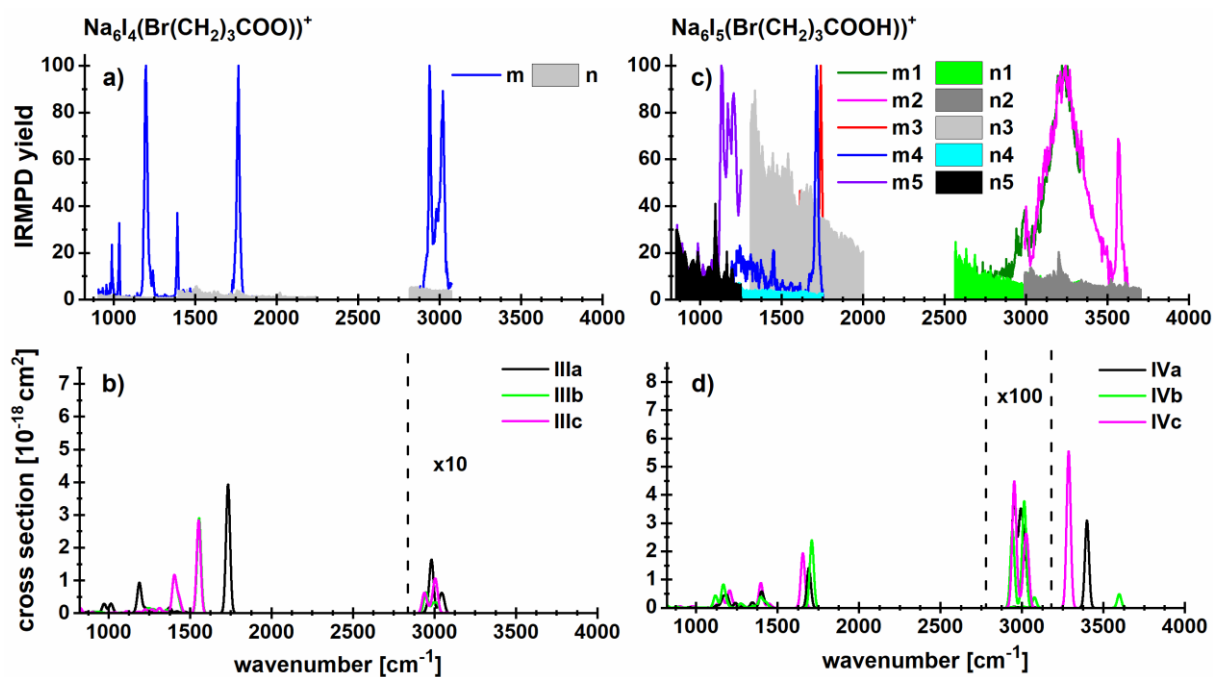

**Figure S2:** a,c) Overview spectra of  $\text{Na}_6\text{I}_4(\text{Br}(\text{CH}_2)_3\text{COO})^+$  and  $\text{Na}_6\text{I}_5(\text{Br}(\text{CH}_2)_3\text{COOH})^+$ . The total IRMPD yield of measurements  $m_X$  with corresponding noise  $n_X$  are displayed here, which are all normalized separately to their maximum. The corresponding theory is shown in b,d).

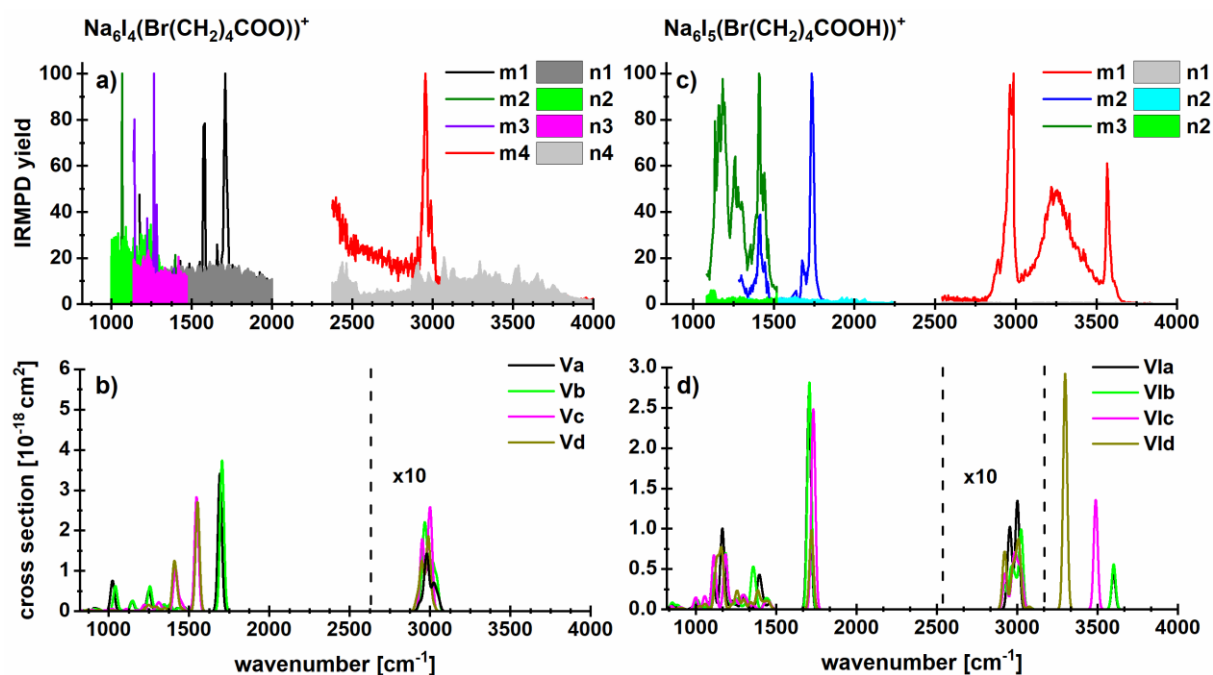

**Figure S3:** a,c) Overview spectra of  $\text{Na}_6\text{I}_4(\text{Br}(\text{CH}_2)_4\text{COO})^+$  and  $\text{Na}_6\text{I}_5(\text{Br}(\text{CH}_2)_4\text{COOH})^+$ . The total IRMPD yield of measurements  $m_X$  with corresponding noise  $n_X$  are displayed here, which are all normalized separately to their maximum. The corresponding theory is shown in b,d).

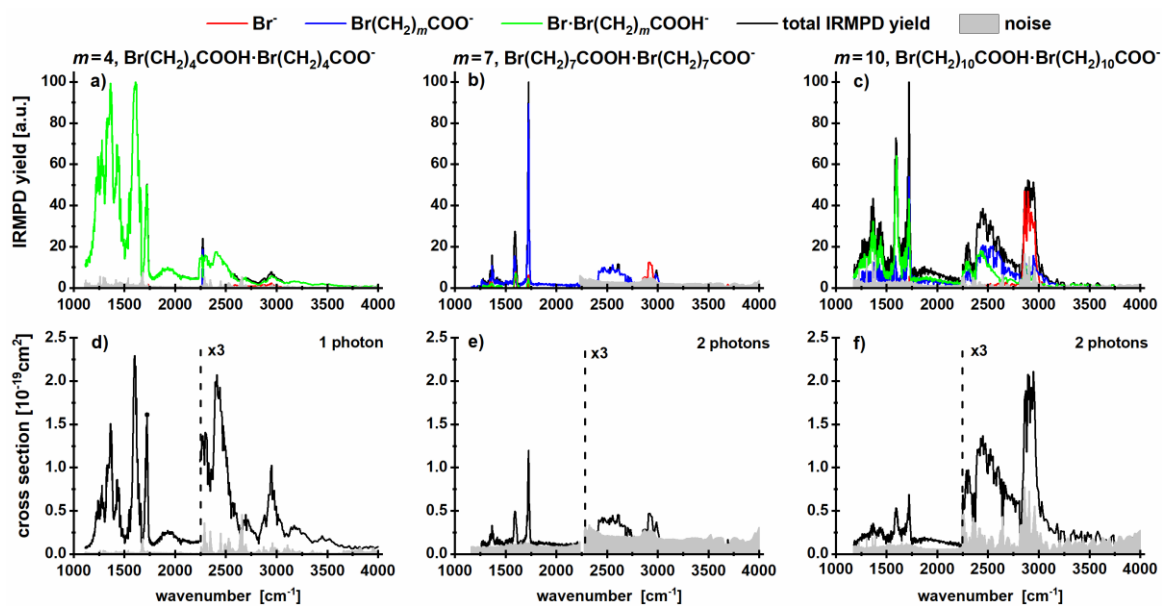

**Figure S4:** (a-c) IRMPD yield spectra and (d-f) experimental cross sections of the cluster  $\text{Br}(\text{CH}_2)_m\text{COO}\cdot\text{Br}(\text{CH}_2)_m\text{COOH}^-$  with  $m = 4$  (column 1),  $m = 7$  (column 2) and  $m = 10$  (column 3).

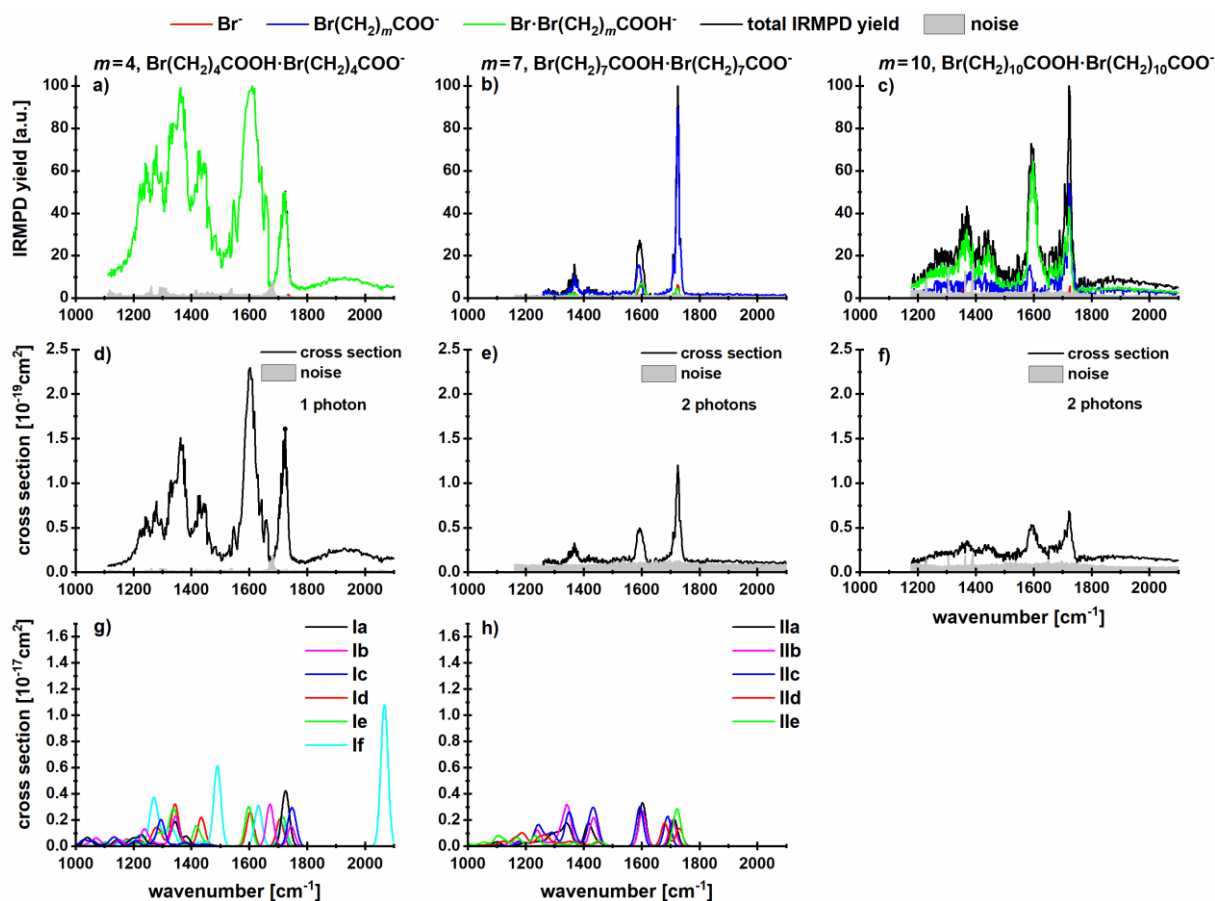

**Figure S5:** (a-c) IRMPD yield spectra, (d-f) experimental and (g-h) theoretical cross sections of the cluster  $\text{Br}(\text{CH}_2)_m\text{COO}\cdot\text{Br}(\text{CH}_2)_m\text{COOH}^-$  with  $m = 4$  (column 1),  $m = 7$  (column 2) and  $m = 10$  (column 3) in the low-energy part of the total spectrum.

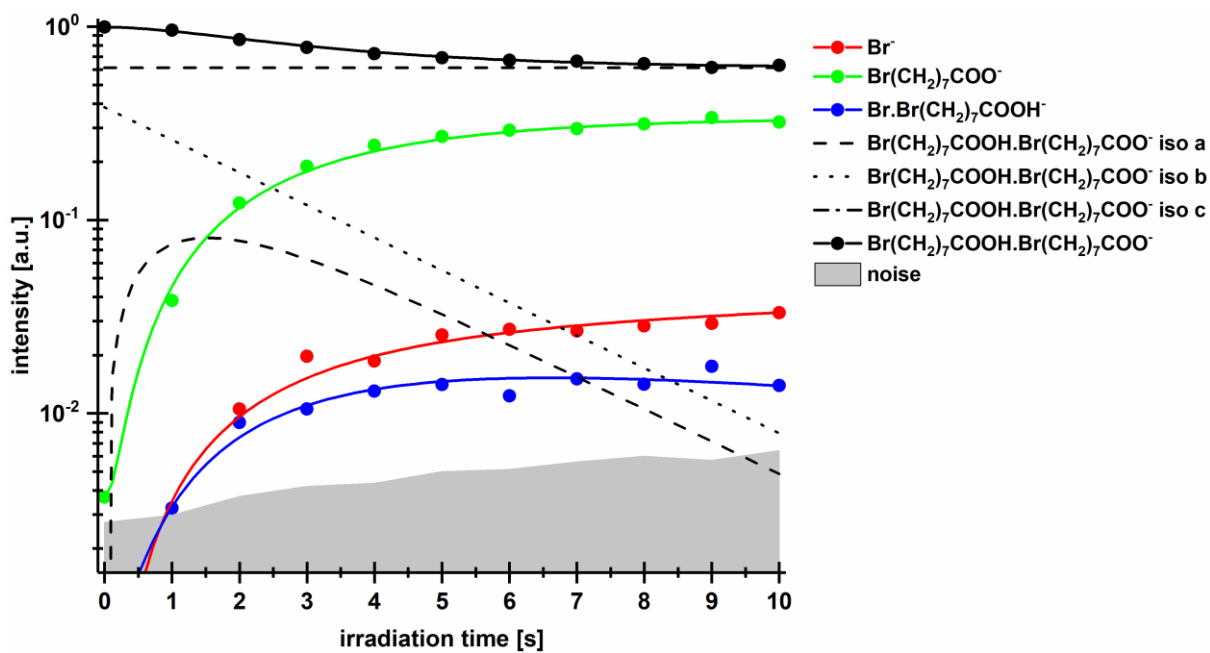

Figure S6: Kinetics of the cluster  $\text{Br}(\text{CH}_2)_7\text{COOH}.\text{Br}(\text{CH}_2)_7\text{COO}^-$  at  $1723\text{ cm}^{-1}$ .

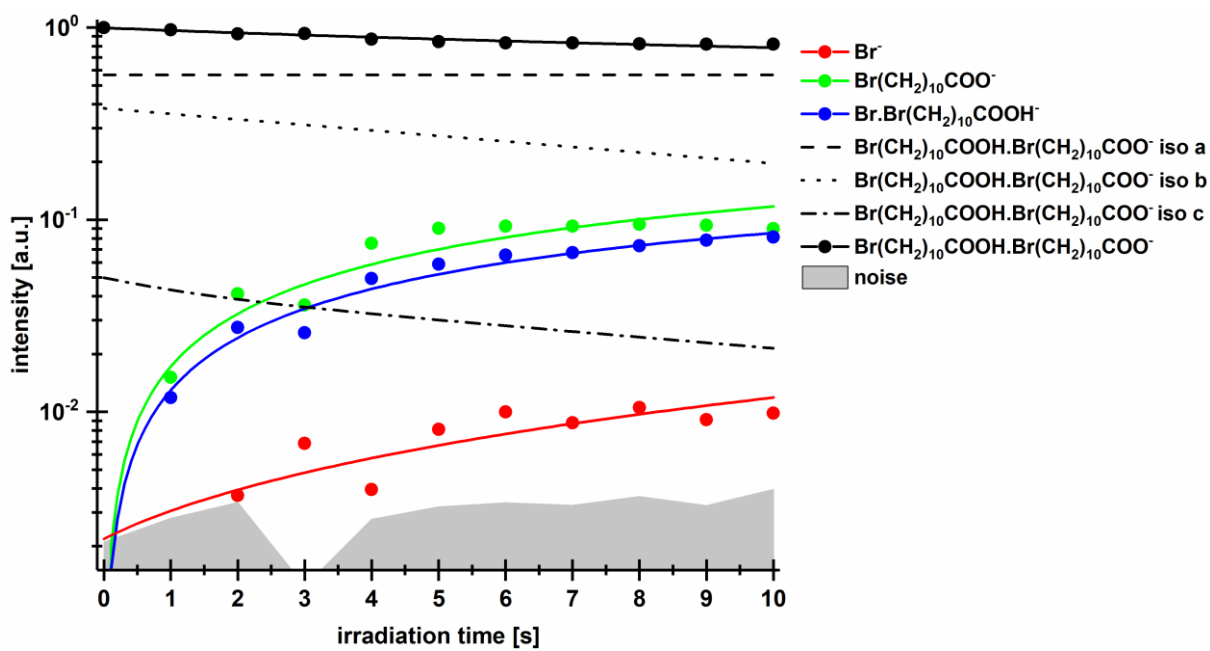

Figure S7: Kinetics of the cluster  $\text{Br}(\text{CH}_2)_{10}\text{COOH}.\text{Br}(\text{CH}_2)_{10}\text{COO}^-$  at  $1724\text{ cm}^{-1}$ .

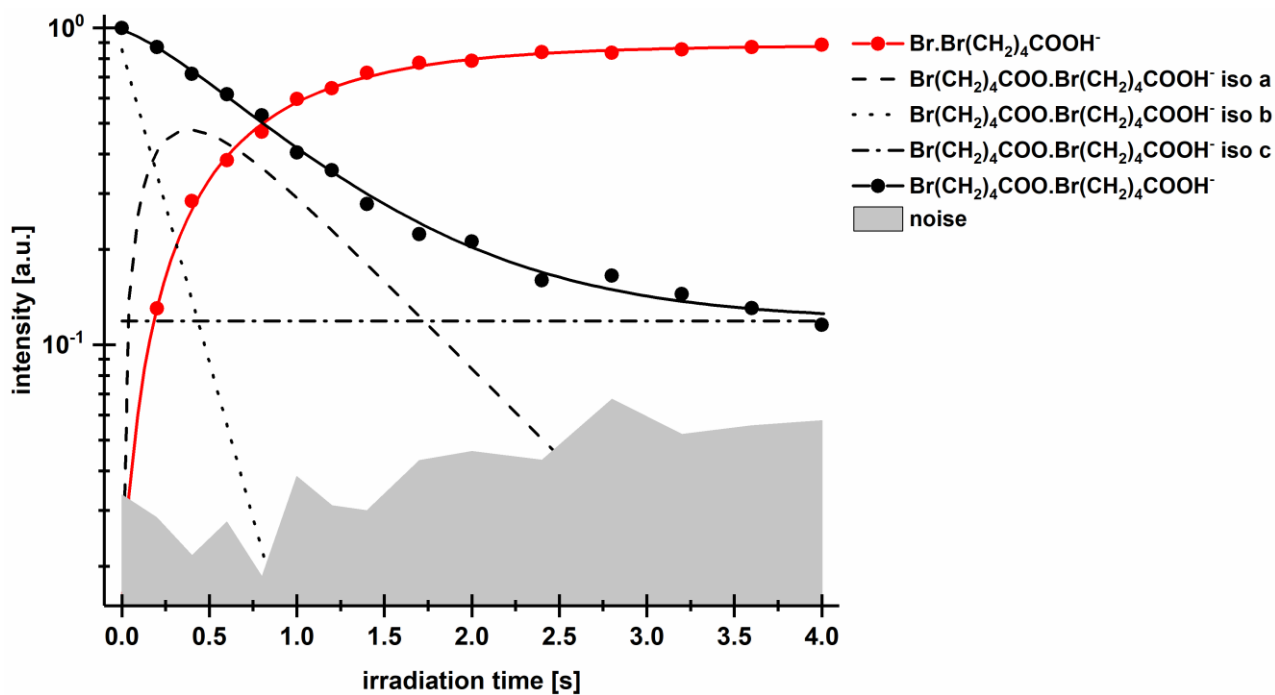

Figure S8: Kinetics of the cluster  $\text{Br}(\text{CH}_2)_4\text{COOH} \cdot \text{Br}(\text{CH}_2)_4\text{COO}^-$  at  $1725 \text{ cm}^{-1}$ .

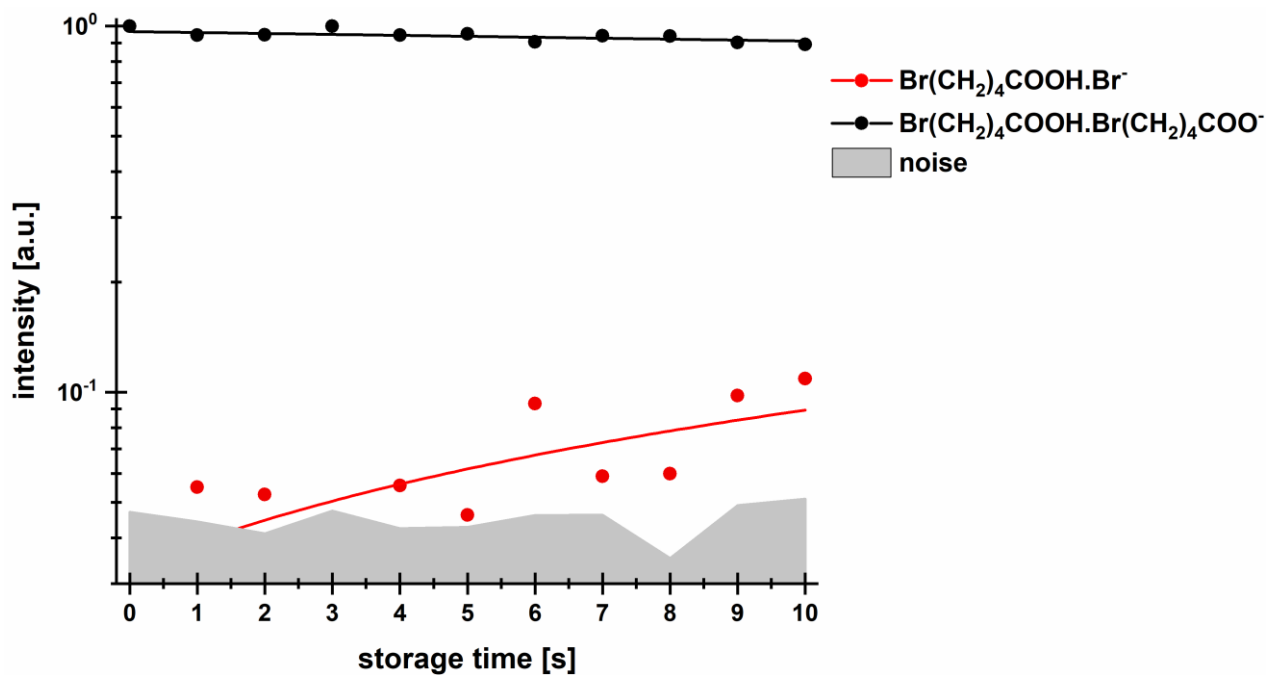

Figure S9: BIRD kinetics of the cluster  $\text{Br}(\text{CH}_2)_4\text{COOH} \cdot \text{Br}(\text{CH}_2)_4\text{COO}^-$ .

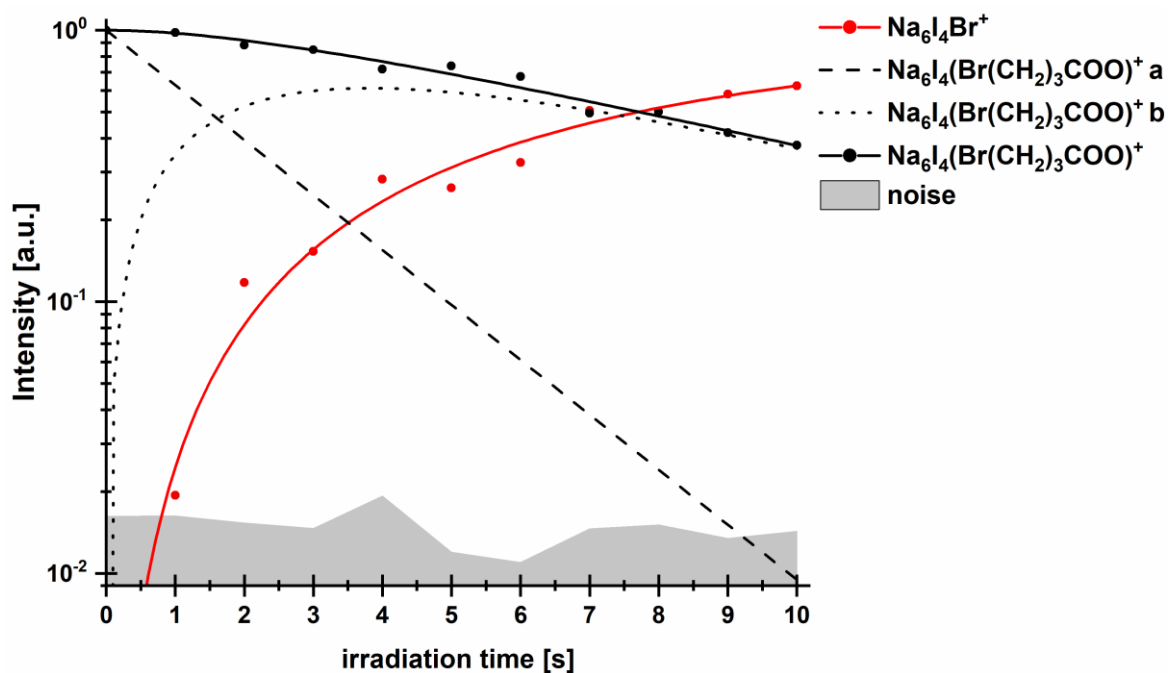

Figure S10: Kinetics of the cluster  $\text{Na}_6\text{I}_4(\text{Br}(\text{CH}_2)_3\text{COO})^+$  at  $2940\text{ cm}^{-1}$ .

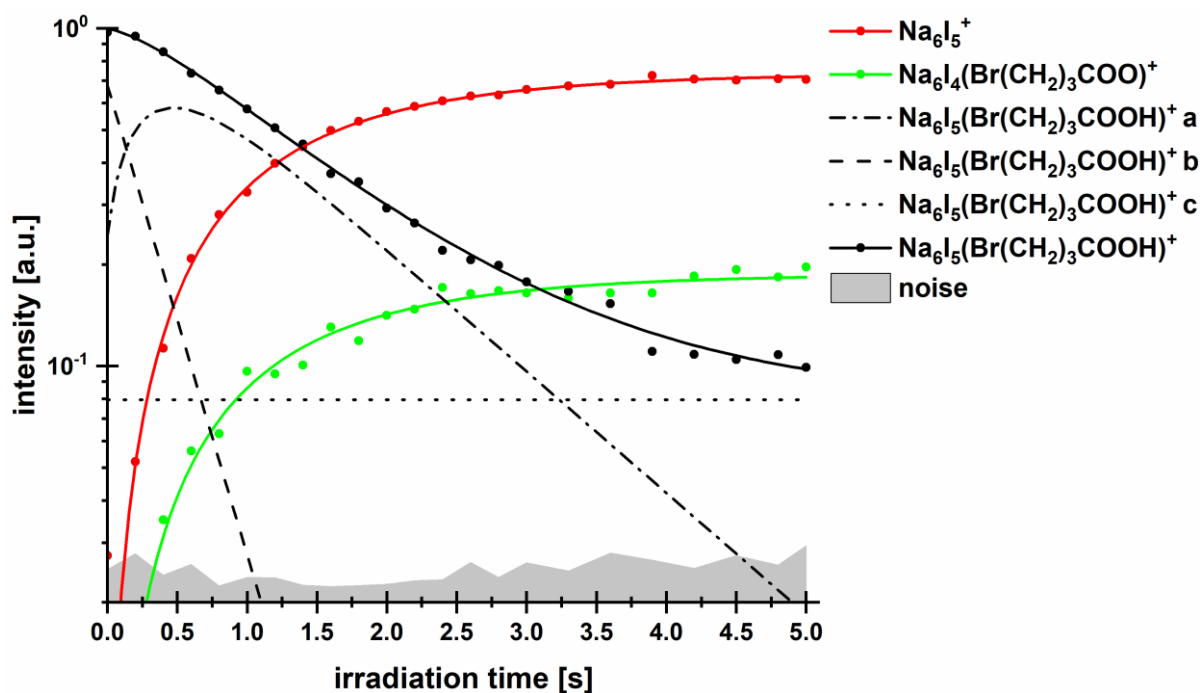

Figure S11: Kinetics of the cluster  $\text{Na}_6\text{I}_5(\text{Br}(\text{CH}_2)_3\text{COOH})^+$  at  $3226\text{ cm}^{-1}$ .

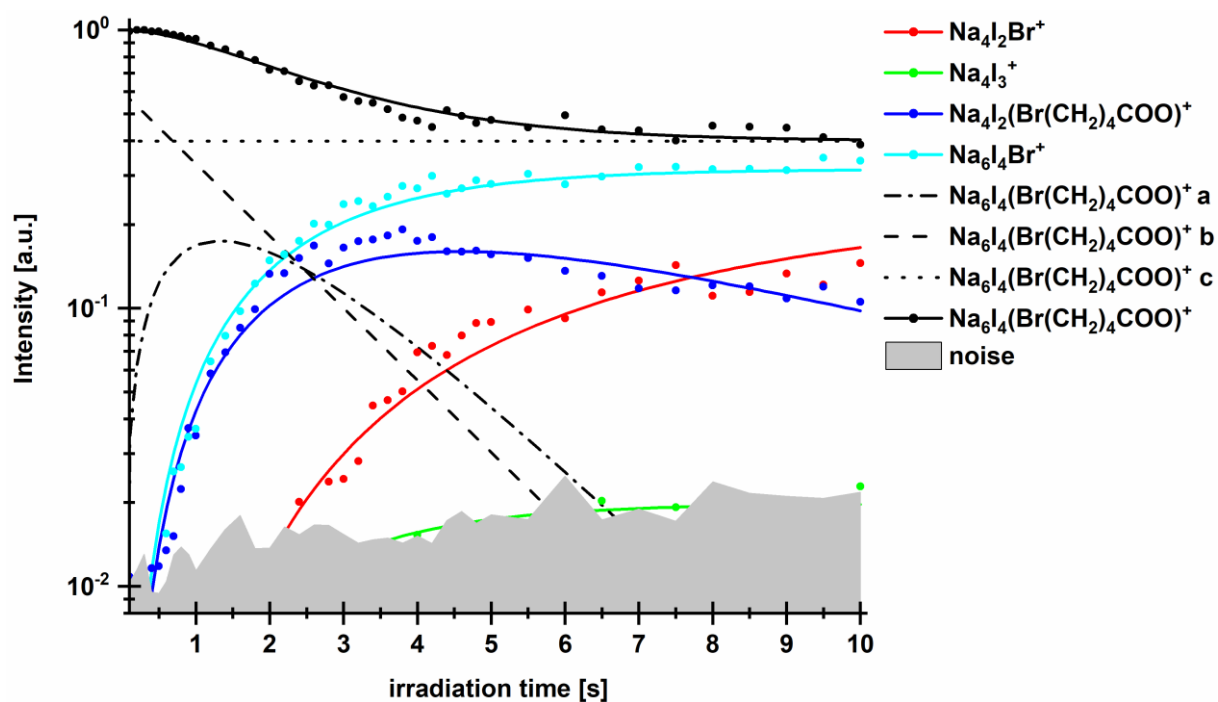

Figure S12: Kinetics of the cluster  $\text{Na}_6\text{I}_4(\text{Br}(\text{CH}_2)_4\text{COO})^+$  at  $2940\text{ cm}^{-1}$ .

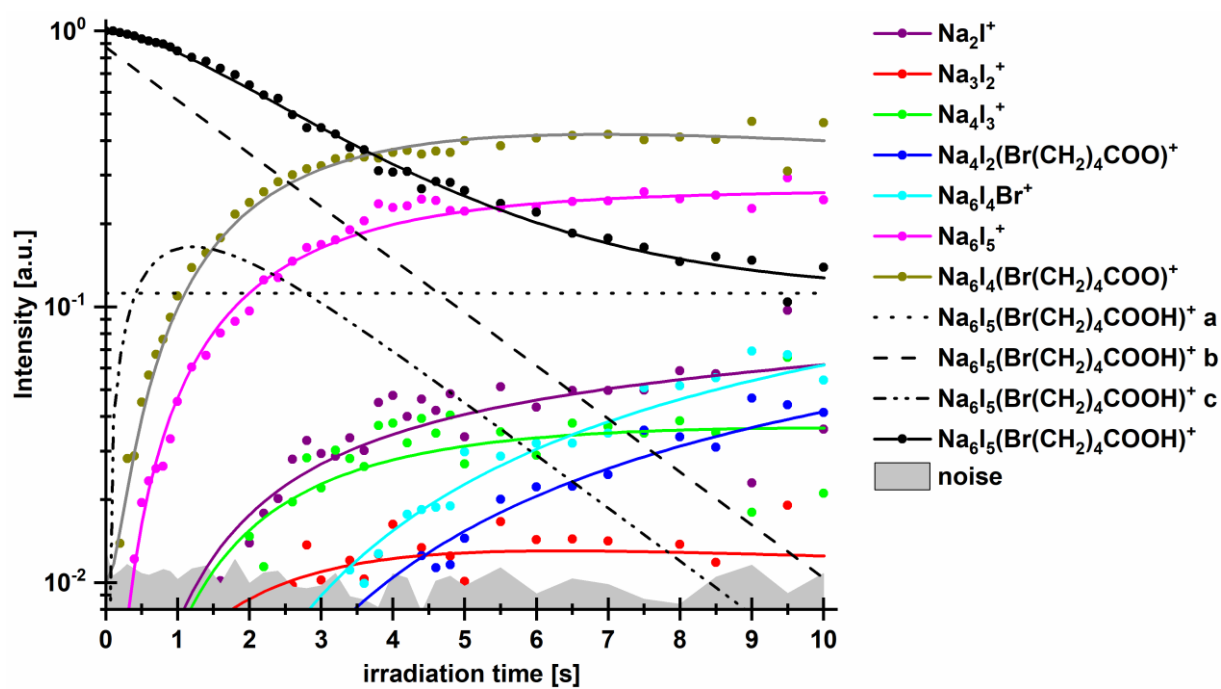

Figure S13: Kinetics of the cluster  $\text{Na}_6\text{I}_5(\text{Br}(\text{CH}_2)_4\text{COOH})^+$  at  $2985\text{ cm}^{-1}$ .

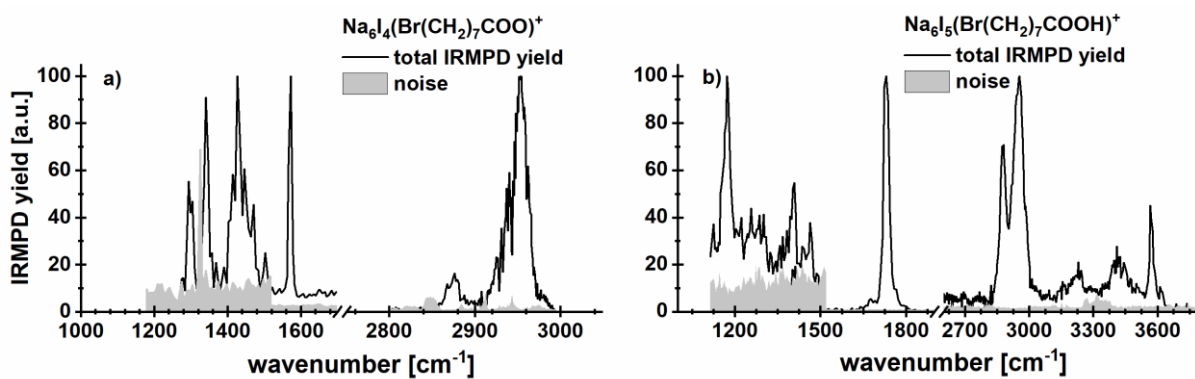

**Figure S14:** IRMPD spectrum for **a)**  $\text{Na}_6\text{I}_4(\text{Br}(\text{CH}_2)_7\text{COO})^+$  (irradiation times 15s, 10s, 3s) and **b)**  $\text{Na}_6\text{I}_5(\text{Br}(\text{CH}_2)_7\text{COOH})^+$  (irradiation times 10s, 5s, 3s), respectively, from 833-3846  $\text{cm}^{-1}$ .

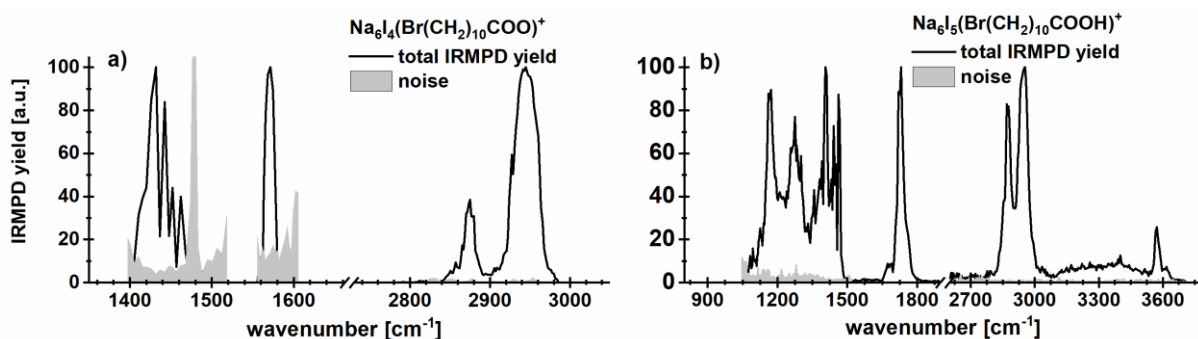

**Figure S15:** IRMPD spectrum for **a)**  $\text{Na}_6\text{I}_4(\text{Br}(\text{CH}_2)_{10}\text{COO})^+$  (irradiation times 3s, 20s, 15s) and **b)**  $\text{Na}_6\text{I}_5(\text{Br}(\text{CH}_2)_{10}\text{COOH})$  (irradiation times 3s, 5s, 15s) respectively, from 833-3846  $\text{cm}^{-1}$ .

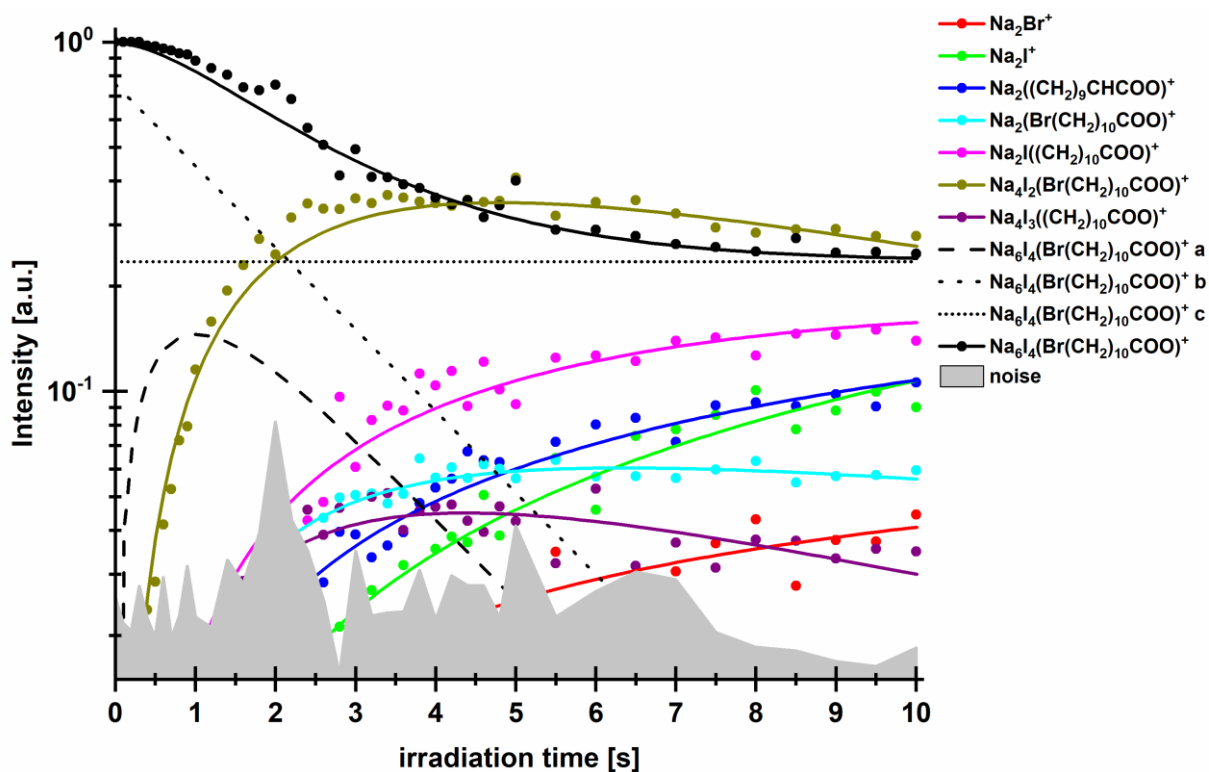

**Figure S16:** Kinetics of the cluster  $\text{Na}_6\text{I}_4(\text{Br}(\text{CH}_2)_{10}\text{COO})^+$  at 2945  $\text{cm}^{-1}$ .



**Table S1:** Intensity of various channels of *n*-bromoalkanoic acid and *n*-bromoalkanoates, *n* = 4,5, in salt environment and of the anionic complexes Br(CH<sub>2</sub>)<sub>m</sub>COOH.Br(CH<sub>2</sub>)<sub>m</sub>COO<sup>-</sup> for *m* = 4,7,10 along with the reaction energies Δ*E*. Calculated at the B3LYP/def2TZVP level of theory.

| parent ion                                                                                | product                                                                                                              | Δ <i>E</i> [kJ/mol] | IR1  | IR2  | IR3  |
|-------------------------------------------------------------------------------------------|----------------------------------------------------------------------------------------------------------------------|---------------------|------|------|------|
|                                                                                           |                                                                                                                      |                     | [%]  | [%]  | [%]  |
|                                                                                           | IR2 1000–2200 cm <sup>-1</sup>                                                                                       |                     |      |      |      |
|                                                                                           | IR3 2200–4000 cm <sup>-1</sup>                                                                                       |                     |      |      |      |
| Br(CH <sub>2</sub> ) <sub>4</sub> COOH.Br(CH <sub>2</sub> ) <sub>4</sub> COO <sup>-</sup> | Br + (CH <sub>2</sub> ) <sub>4</sub> COO.Br(CH <sub>2</sub> ) <sub>4</sub> COOH                                      | 114                 | -    | 1.1  | 5.2  |
|                                                                                           | Br(CH <sub>2</sub> ) <sub>4</sub> COOH.Br <sup>-</sup> + (CH <sub>2</sub> ) <sub>4</sub> OCO                         | 42                  | -    | 98.5 | 94.8 |
|                                                                                           | Br(CH <sub>2</sub> ) <sub>4</sub> COO <sup>-</sup> + Br(CH <sub>2</sub> ) <sub>4</sub> COOH                          | 90                  | -    | 0.4  | -    |
| Br(CH <sub>2</sub> ) <sub>7</sub> COOH.Br(CH <sub>2</sub> ) <sub>7</sub> COO <sup>-</sup> | Br <sup>-</sup> + (CH <sub>2</sub> ) <sub>7</sub> COO.Br(CH <sub>2</sub> ) <sub>7</sub> COOH                         | 61                  | -    | 11.6 | 28.6 |
|                                                                                           | Br(CH <sub>2</sub> ) <sub>7</sub> COOH.Br <sup>-</sup> + (CH <sub>2</sub> ) <sub>7</sub> OCO                         | 34                  | -    | 7.5  | -    |
|                                                                                           | Br(CH <sub>2</sub> ) <sub>7</sub> COO <sup>-</sup> + Br(CH <sub>2</sub> ) <sub>7</sub> COOH                          | 76                  | -    | 80.9 | 71.4 |
|                                                                                           | IR1 833–1500 cm <sup>-1</sup>                                                                                        |                     |      |      |      |
|                                                                                           | IR2 1600–1800 cm <sup>-1</sup>                                                                                       |                     |      |      |      |
|                                                                                           | IR3 2600–4000 cm <sup>-1</sup>                                                                                       |                     |      |      |      |
| Na <sub>6</sub> I <sub>4</sub> (Br(CH <sub>2</sub> ) <sub>3</sub> COO) <sup>+</sup>       | Na <sub>6</sub> I <sub>4</sub> Br <sup>+</sup> + (CH <sub>2</sub> ) <sub>3</sub> OCO                                 | 99                  | 88.2 | 100  | 94.5 |
|                                                                                           | Na <sub>4</sub> I <sub>2</sub> Br <sup>+</sup> + (NaI) <sub>2</sub> (CH <sub>2</sub> ) <sub>3</sub> COO              | 160                 | 0.4  | -    | 0.6  |
|                                                                                           | Na <sub>2</sub> Br <sup>+</sup> + (NaI) <sub>4</sub> (CH <sub>2</sub> ) <sub>3</sub> COO                             | 174                 | 4.4  | -    | -    |
|                                                                                           | Na <sub>4</sub> I <sub>3</sub> <sup>+</sup> + Na <sub>2</sub> I(Br(CH <sub>2</sub> ) <sub>3</sub> COO)               | 167                 | 2.0  | -    | 1.2  |
|                                                                                           | Na <sub>3</sub> I <sub>2</sub> <sup>+</sup> + Na <sub>3</sub> I <sub>2</sub> (Br(CH <sub>2</sub> ) <sub>3</sub> COO) | 203                 | -    | -    | 0.6  |
|                                                                                           | Na <sub>2</sub> I <sup>+</sup> + Na <sub>4</sub> I <sub>3</sub> (Br(CH <sub>2</sub> ) <sub>3</sub> COO)              | 178                 | 4.9  | -    | 3.0  |
| Na <sub>6</sub> I <sub>5</sub> (Br(CH <sub>2</sub> ) <sub>3</sub> COOH) <sup>+</sup>      | Na <sub>6</sub> I <sub>4</sub> (Br(CH <sub>2</sub> ) <sub>3</sub> COO) <sup>+</sup> + HI                             | 14                  | 38.5 | 29.5 | 26.5 |
|                                                                                           | Na <sub>6</sub> I <sub>5</sub> <sup>+</sup> + (Br(CH <sub>2</sub> ) <sub>3</sub> COOH                                | 99                  | 60.3 | 70.5 | 73.5 |
|                                                                                           | Na <sub>2</sub> I <sup>+</sup> + HI + Na <sub>4</sub> I <sub>3</sub> (Br(CH <sub>2</sub> ) <sub>3</sub> COO)         | 191                 | 0.9  | -    | -    |
|                                                                                           | Na <sub>4</sub> I <sub>3</sub> <sup>+</sup> + HI + Na <sub>2</sub> I(Br(CH <sub>2</sub> ) <sub>3</sub> COO)          | 181                 | 0.3  | -    | -    |
| Na <sub>6</sub> I <sub>4</sub> (Br(CH <sub>2</sub> ) <sub>4</sub> COO) <sup>+</sup>       | Na <sub>6</sub> I <sub>4</sub> Br <sup>+</sup> + (CH <sub>2</sub> ) <sub>4</sub> OCO                                 | 104                 | 71.0 | 90.7 | 69.0 |
|                                                                                           | Na <sub>4</sub> I <sub>2</sub> Br <sup>+</sup> + (NaI) <sub>2</sub> ((CH <sub>2</sub> ) <sub>4</sub> COO)            | 194                 | -    | -    | 2.2  |
|                                                                                           | Na <sub>4</sub> I <sub>3</sub> <sup>+</sup> + Na <sub>2</sub> I(Br(CH <sub>2</sub> ) <sub>4</sub> COO)               | 206                 | -    | -    | 0.3  |
|                                                                                           | Na <sub>2</sub> I <sup>+</sup> + Na <sub>4</sub> I <sub>3</sub> (Br(CH <sub>2</sub> ) <sub>4</sub> COO)              | 222                 | 29.1 | -    | -    |
|                                                                                           | Na <sub>4</sub> I <sub>2</sub> (Br(CH <sub>2</sub> ) <sub>4</sub> COO) <sup>+</sup> + (NaI) <sub>2</sub>             | 183                 | -    | 9.3  | 28.6 |
| Na <sub>6</sub> I <sub>5</sub> (Br(CH <sub>2</sub> ) <sub>4</sub> COOH) <sup>+</sup>      | Na <sub>6</sub> I <sub>4</sub> (Br(CH <sub>2</sub> ) <sub>4</sub> COO) <sup>+</sup> + HI                             | 27                  | 85.0 | 89.9 | 75.0 |
|                                                                                           | Na <sub>4</sub> I <sub>2</sub> (Br(CH <sub>2</sub> ) <sub>4</sub> COO) <sup>+</sup> + (NaI) <sub>2</sub> + HI        | 210                 | 0.1  | 1.9  | 0.3  |
|                                                                                           | Na <sub>6</sub> I <sub>4</sub> Br <sup>+</sup> + HI + (CH <sub>2</sub> ) <sub>4</sub> COO                            | 130                 | 6.5  | -    | 1.4  |
|                                                                                           | Na <sub>6</sub> I <sub>5</sub> <sup>+</sup> + Br(CH <sub>2</sub> ) <sub>4</sub> COOH                                 | 105                 | 8.5  | 8.3  | 23.0 |
|                                                                                           | Na <sub>4</sub> I <sub>3</sub> <sup>+</sup> + HI + Na <sub>2</sub> I(Br(CH <sub>2</sub> ) <sub>4</sub> COO)          | 232                 | -    | -    | 0.1  |

**Cartesian coordinates of optimized ions and molecules (in Å, calculated at the B3LYP/def2TZVP level unless noted otherwise) along with electronic energies (in Hartree) including zero point energy**

la  
E = -5840.752116  
C -4.554766 0.364560 0.872815  
O -5.729218 -0.466280 0.628585  
C -5.934230 -1.102154 -0.535867  
C -5.065188 -0.754015 -1.735716  
C -3.779667 0.018564 -1.441074  
C -4.053377 1.066150 -0.369193  
O -6.848286 -1.886750 -0.622770  
O -0.587506 2.261012 0.503405  
C 0.621563 2.672279 0.129737  
C 1.747842 1.663855 0.305228  
C 2.972718 1.971683 -0.549775  
C 4.188959 1.086478 -0.237842  
C 3.934761 -0.380197 -0.527100  
Br 5.578450 -1.470078 -0.267272  
O 0.797759 3.793426 -0.293117  
Br -0.807829 -0.849473 1.124828  
H 5.039945 1.424425 -0.834394  
H 1.351086 0.662219 0.128865  
H 3.253619 3.016730 -0.407877  
H 2.711370 1.873701 -1.608472  
H 4.472977 1.203018 0.811837  
H 2.014298 1.680123 1.369027  
H -0.613674 1.285522 0.751341  
H -4.879089 -1.688595 -2.266137  
H -5.721500 -0.163767 -2.385676  
H -3.403314 0.477979 -2.358015  
H -2.997292 -0.650749 -1.074374  
H -3.142772 1.609712 -0.112854  
H -4.792919 1.796804 -0.718188  
H -4.879034 1.064533 1.641993  
H -3.770302 -0.274733 1.283348  
H 3.198888 -0.831409 0.130922  
H 3.652287 -0.555709 -1.561907

lb  
E = -5840.744891  
O -3.441417 -0.407932 1.881286  
C -3.070864 0.428619 0.903402  
C -3.085248 -0.030291 -0.523676  
C -3.974578 -1.237371 -0.810812  
C -3.705715 -2.284346 0.262831  
C -4.030385 -1.709654 1.624385  
O -2.682356 1.533776 1.242507  
O -1.772943 3.455258 -0.448121  
C -0.450301 3.667836 -0.477488  
O 0.014760 4.527337 -1.187388

C 0.417478 2.781781 0.402780  
C 1.210677 1.754998 -0.422312  
C 2.240968 1.014543 0.439927  
C 2.964405 -0.042713 -0.367431  
Br 4.464436 -0.849746 0.672237  
H 1.739332 0.534911 1.283978  
H -0.180578 2.270242 1.158458  
H 1.718502 2.278334 -1.237060  
H 0.532696 1.025721 -0.872986  
H 2.957896 1.731499 0.851433  
H 1.115993 3.447714 0.916210  
H -2.035930 2.733389 0.173933  
H -3.311574 0.832795 -1.149810  
H -2.045212 -0.333361 -0.746205  
H -3.724860 -1.631249 -1.796479  
H -5.034824 -0.956668 -0.820142  
H -4.316193 -3.180548 0.118378  
H -2.654003 -2.579721 0.203381  
H -3.661307 -2.340744 2.432754  
H -5.110618 -1.584004 1.752925  
H 2.313177 -0.873034 -0.635976  
H 3.447257 0.365225 -1.251827  
Br -0.172800 -2.026494 -1.200147

lc  
E = -5840.740040  
O 2.040375 3.075200 -0.187747  
C 0.729726 3.038279 -0.520416  
O 0.250222 3.953270 -1.141292  
C -0.024062 1.814379 -0.049111  
C -1.487921 1.794705 -0.475709  
C -2.258250 0.644050 0.186580  
C -3.664976 0.575867 -0.366848  
Br -4.821861 -0.713766 0.614259  
H -3.684918 0.229042 -1.396234  
H -4.196720 1.521029 -0.285452  
H -1.737595 -0.298712 0.002428  
H -2.293689 0.800819 1.268300  
H -1.531253 1.690331 -1.562889  
H -1.957525 2.752952 -0.236129  
H 0.472422 0.912611 -0.430613  
H 0.068058 1.768574 1.042119  
H 2.316894 2.271896 0.292892  
O 3.338100 0.726129 0.802121  
C 2.781637 -0.112457 1.727622  
C 2.854780 -1.592262 1.474934  
C 4.055948 -2.048825 0.647022  
C 4.149652 -1.168557 -0.593927

C 4.307871 0.279778 -0.185946  
H 4.173452 0.955989 -1.029371  
H 5.294866 0.465131 0.251519  
H 5.007797 -1.439917 -1.216373  
H 3.238988 -1.295025 -1.187606  
H 3.919038 -3.093882 0.363517  
H 4.980473 -1.988778 1.234821  
H 1.940743 -1.817350 0.900717  
H 2.780254 -2.093493 2.439652  
O 2.195188 0.391583 2.649692  
Br 0.534753 -1.739389 -1.428507

ld

E = -5840.738474  
C 4.356718 0.244418 -0.231040  
C 2.914795 0.517335 0.219022  
C 2.281568 1.700275 -0.505746  
C 0.837467 2.026021 -0.061253  
O 0.299304 2.972124 -0.717529  
C 4.938578 -0.934778 0.516133  
O 0.334578 1.367422 0.861993  
C -2.785611 1.879294 -0.175645  
C -4.011201 1.061862 0.216588  
C -3.847634 -0.426867 -0.117968  
C -5.066997 -1.207264 0.320820  
C -2.951535 3.374293 0.074918  
O -4.020898 3.864262 0.391220  
O -1.869300 4.103958 -0.087985  
H 4.976386 1.128620 -0.058398  
H 2.878949 2.606098 -0.358057  
H 2.298990 -0.371896 0.058606  
H 2.885775 0.703770 1.295521  
H 4.383764 0.045691 -1.305934  
H 2.264590 1.529934 -1.586792  
H -1.004106 3.561191 -0.312106  
H -2.563844 1.752310 -1.241462  
H -1.887836 1.536955 0.348588  
H -4.191965 1.181848 1.288906  
H -4.896618 1.464521 -0.282274  
H -3.700033 -0.552273 -1.193985  
H -2.955770 -0.824686 0.371504  
Br 6.816026 -1.339603 -0.022202  
H 4.997172 -0.762649 1.587349  
H 4.398938 -1.858256 0.324864  
Br -4.948772 -3.144674 -0.128648  
H -5.208307 -1.188721 1.398089  
H -5.976332 -0.872420 -0.171247

le

E = -5840.738158  
C 3.889164 0.005690 -0.546645  
C 3.515366 1.352902 0.086665  
C 2.957488 2.348701 -0.940180

C 2.536563 3.651044 -0.271475  
O 3.226577 4.650647 -0.321167  
C 4.103260 -1.027545 0.537361  
O 1.395301 3.623667 0.393604  
Br -6.746318 -0.782215 -0.300666  
C -5.114109 0.318873 0.016466  
C -3.862515 -0.518475 0.157574  
C -2.635686 0.370605 0.403530  
C -1.342807 -0.427828 0.552211  
H 4.784467 0.102661 -1.167411  
H 3.706657 2.590200 -1.696099  
H 2.754242 1.172493 0.847724  
H 4.393018 1.788107 0.576068  
H 3.076934 -0.328270 -1.196181  
H 2.090106 1.897819 -1.428390  
H 0.876109 2.736640 0.316643  
H -5.072431 0.991433 -0.835797  
H -5.342249 0.884564 0.915719  
H -3.986940 -1.226571 0.981356  
H -3.715233 -1.111665 -0.749073  
H -2.511313 1.083741 -0.413772  
H -2.794172 0.970845 1.305758  
Br 4.723312 -2.777817 -0.197664  
H 4.883713 -0.746640 1.239826  
H 3.179081 -1.248096 1.063404  
C -0.066923 0.431513 0.707409  
H -1.394812 -1.109783 1.403859  
H -1.194220 -1.053252 -0.336497  
O 0.879593 -0.071526 1.334373  
O -0.102290 1.568963 0.142805

lf

E = -5840.735749  
C 4.463311 0.458276 -0.310893  
C 3.353899 1.297125 0.335777  
C 2.609894 2.156952 -0.695369  
C 1.542762 3.037200 -0.047535  
O 1.715210 4.233556 0.097464  
C 5.113538 -0.445317 0.713635  
O 0.449311 2.427170 0.356806  
Br -7.395980 -0.260086 0.019340  
C -5.622274 -1.164962 0.125634  
C -4.463266 -0.207999 -0.043955  
C -3.126225 -0.957267 0.039086  
C -1.918814 -0.040518 -0.126650  
H 5.216794 1.111671 -0.759372  
H 3.306654 2.818863 -1.211966  
H 2.634533 0.633820 0.818564  
H 3.786395 1.946203 1.104951  
H 4.039733 -0.149338 -1.113636  
H 2.138832 1.493040 -1.423693  
H 0.427681 1.383860 0.159392  
H -5.625408 -1.648650 1.098689

H -5.657784 -1.919343 -0.655602  
H -4.546631 0.300946 -1.007997  
H -4.511055 0.566563 0.725997  
H -3.052337 -1.477138 0.999074  
H -3.081456 -1.738779 -0.722858  
Br 6.648859 -1.468696 -0.037136  
H 5.541731 0.105908 1.546800  
H 4.432212 -1.205343 1.084779  
C -0.561940 -0.783302 -0.137126  
H -1.991792 0.513883 -1.069222  
H -1.895744 0.719473 0.659460  
O 0.471083 -0.029594 -0.070148  
O -0.555409 -2.012308 -0.224886

Ila

E = -6076.532745

C -4.527008 -0.676485 1.361134  
C -3.008132 -0.781818 1.227910  
C -2.255422 -0.393853 2.500917  
C -0.736951 -0.469956 2.352411  
C -0.105415 0.551603 1.375733  
O -0.785557 1.605601 1.166190  
C -5.274023 -1.038996 0.075989  
O 1.011461 0.273412 0.912293  
O -0.529336 3.450288 -0.568609  
C 0.588729 4.149710 -0.639388  
O 0.687579 5.128352 -1.355721  
C 1.764166 3.641175 0.183037  
C 2.620382 2.659559 -0.629872  
C 3.764774 2.067989 0.189789  
C 4.591310 1.044902 -0.588252  
C 5.694838 0.398821 0.251505  
H -2.577664 -1.046256 3.323394  
H -2.526379 0.629017 2.773387  
H -0.264217 -0.294517 3.325443  
H -0.420684 -1.468420 2.037955  
H -2.740841 -1.807921 0.944673  
H -2.669620 -0.132247 0.416720  
H -4.873106 -1.326085 2.174747  
H -4.791067 0.346019 1.652632  
H 5.038067 1.519900 -1.470349  
H 3.920776 0.263764 -0.959792  
H 4.421257 2.870678 0.551028  
H 3.331637 1.578594 1.066161  
H 3.009795 3.170006 -1.517528  
H 1.982620 1.838564 -0.962405  
H 2.362516 4.507154 0.475184  
H 1.404603 3.132531 1.078677  
H -0.515080 2.679265 0.119321  
C 6.531848 -0.620178 -0.532500  
H 6.354070 1.179096 0.650245  
H 5.238117 -0.091886 1.117451  
C 7.590542 -1.248726 0.347437

H 5.881248 -1.399599 -0.936514  
H 7.008252 -0.130987 -1.386136  
Br 8.727622 -2.551082 -0.635621  
H 8.292945 -0.518734 0.741243  
H 7.164487 -1.822039 1.166348  
C -6.798773 -0.949816 0.218559  
H -4.941473 -0.375565 -0.729290  
H -4.996801 -2.054527 -0.229530  
C -7.492762 -1.301968 -1.079678  
H -7.137110 -1.625415 1.008625  
H -7.083992 0.060355 0.522869  
Br -9.473298 -1.237826 -0.924106  
H -7.257796 -0.605711 -1.880164  
H -7.277688 -2.316249 -1.405544

Ilb

E = -6076.532509

C -4.763792 0.405308 -0.030974  
C -6.221551 0.190519 0.381134  
C -4.191069 1.747268 0.427393  
C -2.736582 1.969394 0.010127  
C -2.171441 3.306373 0.475595  
C -0.729184 3.607069 0.007958  
O -0.212263 2.869301 -0.845433  
O -0.209709 4.626015 0.563776  
O 1.933341 5.765410 -0.150446  
C 3.040099 5.057319 -0.242369  
O 4.097757 5.556288 -0.583141  
C 2.912343 3.583293 0.120724  
C 4.157581 2.759903 -0.185021  
C 4.001037 1.293037 0.217312  
C 5.222626 0.435094 -0.112978  
C 5.061122 -1.032622 0.287979  
H -4.811594 2.557879 0.025556  
H -2.799001 4.129106 0.113251  
H -2.114407 1.158678 0.402747  
H -2.644399 1.905926 -1.077057  
H -4.274942 1.818552 1.519012  
H -2.190252 3.381012 1.567250  
H 1.084780 5.215983 0.110514  
H 2.672733 3.535090 1.189598  
H 2.029631 3.178986 -0.385169  
H 4.375328 2.823935 -1.255594  
H 5.024332 3.196782 0.319154  
H 3.798892 1.230966 1.293679  
H 3.118028 0.874827 -0.278017  
H -4.681835 0.330764 -1.121105  
H -4.150745 -0.407546 0.374512  
H 5.426050 0.493894 -1.188238  
H 6.106009 0.850591 0.385697  
C -6.788564 -1.158340 -0.079523  
H -6.303135 0.266109 1.471497  
H -6.834853 1.001704 -0.027526

C -8.231070 -1.323248 0.349450  
H -6.719273 -1.237129 -1.167379  
H -6.188697 -1.972957 0.334067  
Br -9.001508 -3.060100 -0.227176  
H -8.347344 -1.316625 1.430062  
H -8.884179 -0.573787 -0.089895  
C 6.289988 -1.888601 -0.044104  
H 4.855676 -1.092524 1.362819  
H 4.180346 -1.447612 -0.214357  
C 6.081285 -3.330811 0.365770  
H 6.496838 -1.839665 -1.116187  
H 7.169808 -1.487315 0.465409  
Br 7.657141 -4.471184 -0.038027  
H 5.930097 -3.441984 1.436260  
H 5.258981 -3.800557 -0.167326

llc

E = -6076.526698  
C 5.863698 -0.369281 -0.396250  
C 6.145700 -0.747358 1.044731  
C 4.869816 -0.788430 1.901554  
C 4.210586 0.572737 2.132986  
C 2.950394 0.509330 3.005217  
C 1.724237 -0.190424 2.396528  
C 1.100070 0.509108 1.186254  
C 1.659128 0.110286 -0.175646  
O 1.156413 0.748574 -1.204733  
Br 7.522884 -0.462828 -1.499421  
O 2.513133 -0.753524 -0.310165  
H 1.180486 1.597317 1.275863  
H 0.021976 0.327368 1.138216  
H 1.971025 -1.218543 2.123797  
H 0.964487 -0.252512 3.181689  
H 2.661183 1.532262 3.272438  
H 3.205508 0.012053 3.949689  
H 3.959787 1.029702 1.173716  
H 4.935662 1.240928 2.614523  
H 4.149270 -1.457179 1.429032  
H 5.131964 -1.224449 2.872859  
H 6.867268 -0.044400 1.472929  
H 6.618731 -1.732512 1.062648  
H 5.522972 0.652987 -0.517130  
H 5.156867 -1.036114 -0.879010  
H 0.397122 1.440145 -0.968965  
O -0.592488 2.503780 -0.804035  
C -1.712399 2.282364 -0.242943  
O -2.069495 1.238797 0.327560  
C -2.681649 3.486048 -0.289314  
C -4.081520 3.215550 0.255721  
H -2.204372 4.293028 0.275660  
H -2.724224 3.837913 -1.324985  
H -4.626330 4.162766 0.361696  
C -4.896347 2.255703 -0.610612

H -3.986954 2.786492 1.257131  
C -6.265978 1.915552 -0.019242  
H -5.039211 2.692153 -1.607480  
H -4.303156 1.351099 -0.747157  
C -7.050762 0.836478 -0.784617  
H -6.142326 1.597840 1.022706  
H -6.866326 2.831238 0.019988  
H -8.123474 1.030634 -0.685531  
H -6.830092 0.914221 -1.855245  
C -6.831038 -0.614300 -0.318299  
H -7.525456 -1.262756 -0.859152  
C -5.422715 -1.141227 -0.520210  
H -7.092462 -0.694086 0.740714  
Br -5.324319 -3.068438 -0.038024  
H -5.103775 -1.102585 -1.558131  
H -4.673757 -0.664545 0.103909

lld

E = -6076.522133  
C 2.986175 -0.920145 -0.458234  
Br 3.137367 -2.745802 -1.263036  
C 4.357622 -0.346429 -0.170393  
C 4.306323 1.067696 0.436305  
C 3.763129 2.166910 -0.500416  
C 2.303280 2.550900 -0.245424  
C 1.778141 3.593324 -1.233133  
C 0.362799 4.074510 -0.917806  
C -0.714456 3.033609 -1.148088  
O -0.604359 2.076128 -1.877927  
O -1.830659 3.318819 -0.465745  
C -4.251650 0.584640 0.213679  
O -3.492636 -0.072268 1.073303  
C -2.033363 -0.188622 0.911555  
C -1.723637 -1.672834 0.835866  
C -2.011205 -2.357454 -0.513652  
C -3.317954 -1.980856 -1.230695  
C -4.640468 -2.299786 -0.495716  
C -5.737250 -1.241032 -0.716600  
C -5.648608 0.007232 0.199713  
H -6.343947 0.771372 -0.147240  
H -1.729740 0.359577 0.021378  
H -1.563825 0.256143 1.786718  
H -2.270148 -2.162482 1.646857  
H -0.665585 -1.779809 1.087324  
H -1.190339 -2.124740 -1.198156  
H -1.973728 -3.441947 -0.362755  
H -3.278067 -0.918481 -1.480319  
H -3.330703 -2.487245 -2.201366  
H -4.462865 -2.409895 0.575649  
H -5.017069 -3.266886 -0.841175  
H -5.717087 -0.914886 -1.760828  
H -6.722793 -1.685223 -0.551123  
H -5.913478 -0.278634 1.219025

H -2.502111 2.606933 -0.595561  
H 0.097758 4.930019 -1.550056  
H 0.284209 4.423411 0.113912  
H 2.443837 4.464214 -1.232180  
H 1.796977 3.183931 -2.247102  
H 2.212624 2.930515 0.777057  
H 1.669107 1.663617 -0.273830  
H 3.883848 1.854997 -1.545742  
H 4.376840 3.068712 -0.391786  
H 5.330533 1.319334 0.729266  
H 3.712893 1.035884 1.354387  
H 4.870051 -1.008869 0.531541  
H 4.954146 -0.331012 -1.088652  
H 2.387047 -1.040978 0.443660  
H 2.431741 -0.359327 -1.204299  
Br 1.207672 -0.097818 2.775606  
O -3.887315 1.482129 -0.524169

Ile

E = -6076.521664  
C -4.379615 -0.299693 0.165498  
Br -6.152728 -1.133764 0.571940  
C -4.525195 0.800472 -0.867117  
C -3.173054 1.424348 -1.249804  
C -2.507120 2.245575 -0.144568  
C -1.135213 2.772838 -0.564219  
C -0.489123 3.666726 0.494160  
C 0.916789 4.191097 0.127852  
C 1.986101 3.134039 0.273641  
O 2.665517 2.990981 1.266203  
O 2.094420 2.354248 -0.809159  
O 3.959394 0.220095 -0.379895  
C 4.189396 -0.770247 -1.299161  
O 5.281266 -0.963684 -1.771970  
C 2.974327 -1.614280 -1.567222  
C 3.113980 -2.972999 -0.823807  
C 2.643127 -3.015378 0.642591  
C 3.065110 -1.861184 1.559484  
C 4.581150 -1.601116 1.720126  
C 4.928144 -0.103914 1.831130  
C 5.061649 0.603156 0.481815  
H 4.997000 1.683491 0.598334  
H 2.041231 -1.125466 -1.280694  
H 2.953480 -1.810478 -2.640133  
H 4.151443 -3.307553 -0.916934  
H 2.509584 -3.697507 -1.373549  
H 1.550572 -3.024858 0.638847  
H 2.975309 -3.972013 1.065437  
H 2.571444 -0.958863 1.203079  
H 2.633740 -2.045870 2.547943  
H 5.142412 -2.037278 0.888437  
H 4.944721 -2.116447 2.613759  
H 4.166393 0.401870 2.429533

H 5.881842 0.033730 2.352313  
H 5.989464 0.341547 -0.024574  
H 2.700140 1.606735 -0.615652  
H 1.190441 5.006761 0.797441  
H 0.912314 4.564593 -0.898885  
H -1.129287 4.537735 0.672112  
H -0.429084 3.131455 1.446672  
H -1.228552 3.340598 -1.499052  
H -0.494621 1.915182 -0.779027  
H -2.371618 1.620373 0.741999  
H -3.161369 3.079311 0.146468  
H -3.333529 2.066949 -2.123782  
H -2.484939 0.629139 -1.549319  
H -4.987523 0.378897 -1.763271  
H -5.208107 1.570501 -0.492771  
H -3.738252 -1.112200 -0.164405  
H -4.033144 0.054305 1.130181  
Br -0.710671 -1.356647 -0.408349

Illa

E = -5046.251263  
I 0.615968 -1.696006 -0.743963  
Na -0.478319 0.704950 1.086627  
I 1.913405 2.615652 0.742880  
Na 3.132658 0.055142 -0.375084  
Na -0.115541 3.929346 -0.913535  
I -2.387664 2.047422 -1.295607  
Na -1.744360 -0.752014 -2.486100  
Br -3.804112 -2.202355 -1.375151  
Na -1.996785 -2.862847 0.660918  
Na -4.303507 -0.003949 0.278553  
I -2.611455 -0.695087 2.671416  
O 5.235434 -0.440425 -0.791188  
C 6.308572 -0.852697 -0.401352  
O 6.474412 -1.292994 0.843625  
C 7.862121 -1.679861 1.081140  
C 8.466338 -1.867348 -0.312756  
C 7.602754 -0.941769 -1.174145  
H 7.420182 -1.289397 -2.188734  
H 8.014288 0.069528 -1.244420  
H 8.356434 -2.902271 -0.637545  
H 9.525047 -1.618028 -0.335195  
H 7.841222 -2.579927 1.689329  
H 8.330174 -0.871956 1.644389

Illb

E = -5046.227069  
Na -2.232950 -1.161918 1.425072  
I -4.278940 0.890675 0.586455  
Na -3.123999 3.500802 -0.095794  
I 0.472657 -1.335461 2.773222  
Na 0.831701 -0.623207 -2.586848  
I 3.269651 -1.444299 -1.027823

Na 1.044277 -3.024500 0.311572  
Na 2.772397 0.134883 1.487314  
I -1.447678 -2.360598 -1.405296  
Na -2.493502 0.572026 -1.916052  
Br 3.119496 3.089126 1.098880  
C 3.208088 3.445019 -0.871814  
C 2.096101 2.757180 -1.634810  
C 0.696128 3.280897 -1.329422  
C -0.461479 2.390098 -1.764008  
O -1.629805 2.791587 -1.495067  
O -0.243052 1.285140 -2.328017  
H 4.191220 3.086021 -1.157237  
H 3.176362 4.529606 -0.928668  
H 2.153880 1.684557 -1.447432  
H 2.322078 2.891381 -2.698361  
H 0.538458 4.265315 -1.777849  
H 0.576741 3.424973 -0.251686

### IIIc

E = -5046.225349  
Na -1.053143 -0.747521 -0.750373  
I -0.112053 -0.668046 2.412272  
Na 1.526527 1.445608 0.789990  
I 4.057527 -0.072720 0.354170  
Na 2.329687 -0.419654 -2.072462  
Na 2.180143 -2.380722 0.991933  
I 0.820134 -2.964349 -1.645609  
Na -3.638861 1.494398 -1.516205  
I -4.193639 -1.002929 -0.109141  
Na -2.993257 -1.341727 2.548960  
Br -0.102568 3.980921 0.816386  
C 0.218772 4.976484 -0.884462  
C -0.448553 4.359208 -2.096250  
C 0.151748 3.039370 -2.598361  
C -0.268026 1.785123 -1.840518  
O -1.491510 1.517370 -1.736898  
O 0.636471 1.025571 -1.373719  
H 1.300432 5.024457 -0.974667  
H -0.172547 5.964903 -0.665449  
H 1.240390 3.102704 -2.612770  
H -0.176424 2.889107 -3.630800  
H -0.340990 5.103764 -2.892548  
H -1.520757 4.250325 -1.924724

### IVa

E = -5344.656409  
Na 1.462610 -2.009875 1.770239  
I 2.438371 -2.131877 -1.263181  
Na 0.908650 0.288894 -2.546910  
Na 4.003528 0.295336 -0.148793  
I 3.055530 0.358785 2.715595  
Na 1.598966 2.697384 1.549266  
I 2.473563 2.642122 -1.433377

I -1.932521 -0.715597 -2.512400  
Na -0.480467 -3.139804 -1.387110  
I -1.368791 -3.026599 1.511499  
Na -3.198909 -1.039249 0.208765  
Br -5.328654 0.979196 0.719862  
C -4.756689 2.532447 1.841886  
C -3.278903 2.836527 1.731795  
C -2.834686 3.318843 0.354678  
C -1.339612 3.411359 0.207133  
O -0.544150 3.133865 1.089958  
O -0.973646 3.806087 -1.002837  
H -5.043361 2.245382 2.847970  
H -5.393578 3.339531 1.490479  
H -3.065626 3.608524 2.478608  
H -2.695924 1.965513 2.035257  
H -3.255860 4.299188 0.114253  
H -3.187689 2.651568 -0.437078  
H 0.002384 3.761986 -1.095814

### IVb

E = -5344.655858  
Na -2.050430 1.040745 2.040074  
I -3.018578 1.552096 -0.949516  
Na -0.694419 0.315254 -2.647713  
I -1.053045 -2.638038 -2.150276  
Na -0.348373 -3.164903 0.724586  
I -2.566858 -1.919541 2.275738  
Na -3.438784 -1.495020 -0.594397  
I 0.220297 2.996236 2.244070  
Na -0.673872 3.567846 -0.585812  
I 1.534065 2.269755 -2.221627  
Na 2.547669 1.937528 0.632299  
Br 2.568680 -2.735367 1.060468  
C 3.348238 -2.818182 -0.783196  
C 4.098750 -1.562482 -1.172645  
C 5.329297 -1.230551 -0.323385  
C 5.068635 -0.355350 0.876657  
O 4.225020 0.519671 0.936396  
O 5.917325 -0.593532 1.870604  
H 2.495233 -2.998797 -1.430052  
H 3.983767 -3.698348 -0.745117  
H 4.429214 -1.739921 -2.201383  
H 3.425195 -0.706013 -1.216898  
H 5.861268 -2.126071 -0.001557  
H 6.039795 -0.659245 -0.930512  
H 5.752108 0.033675 2.594486

### IVc

E = -5344.651093  
C 5.618067 2.376017 0.593814  
Br 5.318547 0.815907 1.796010  
C 4.379220 2.717297 -0.207940  
C 3.200830 3.233163 0.644716

C 1.866085 2.811512 0.093087  
O 1.053794 3.813199 -0.176680  
O 1.559964 1.634880 -0.081546  
Na 0.117603 0.414454 -1.656198  
I 2.592358 -1.248019 -2.274297  
Na 0.838992 -3.235875 -0.891227  
I 0.882202 -2.264681 2.017431  
Na -2.046935 -1.785235 1.577884  
I -1.971469 -2.037015 -1.540590  
Na -3.941060 0.180481 -1.142258  
I -2.123832 2.726847 -1.355824  
Na -3.303337 2.883794 1.392583  
Na 2.797507 -0.354075 0.607077  
H 3.257578 2.799131 1.647636  
H 4.664387 3.486706 -0.931639  
H 4.081748 1.847351 -0.796191  
H 6.443052 2.071774 -0.042126  
H 5.937110 3.171804 1.261227  
H 3.231308 4.315240 0.751389  
H 0.186679 3.485848 -0.516190  
I -4.366745 0.194828 1.876353

Va

E = -5085.548879  
Na 0.838497 1.645541 -0.300704  
I -0.020206 -1.183370 -1.961827  
Na -2.609042 0.279334 -1.414489  
I -1.921988 2.925269 -0.228133  
Na -2.119679 1.015177 2.058253  
I 0.646028 -0.097169 2.554502  
Na 3.738999 -0.256440 1.619309  
I 3.793265 1.605567 -0.747704  
Na 3.210952 -1.099361 -1.933129  
Br 3.579934 -2.730669 0.313713  
O -3.644701 -0.298125 0.888702  
C -4.728632 -0.643299 0.449324  
O -4.854004 -0.709977 -0.883262  
C -5.943305 -0.972268 1.260214  
C -6.144562 -1.145723 -1.435165  
C -6.580524 -2.425591 -0.753646  
C -6.677908 -2.244426 0.775015  
H -6.256661 -3.114931 1.276373  
H -7.717260 -2.175118 1.093139  
H -7.537320 -2.736034 -1.175523  
H -5.860227 -3.207450 -1.001783  
H -6.854832 -0.328152 -1.301922  
H -5.955877 -1.276883 -2.496982  
H -5.656374 -1.036779 2.307078  
H -6.608433 -0.106315 1.164251  
Na 0.871384 -2.498615 0.665763

Vb

E = -5085.541630

O -6.321395 -0.125627 0.903326  
C -5.782800 -1.163385 0.266270  
C -6.689771 -2.328311 -0.015102  
C -8.058966 -1.902394 -0.590458  
C -8.543658 -0.565099 0.008620  
O -4.604185 -1.122363 -0.035919  
Na -2.771667 0.114785 0.087325  
I -0.826823 0.597305 2.421107  
Na -0.346461 2.948810 0.622148  
I 2.505614 2.355765 -0.579751  
Na 1.514346 -0.521479 0.919153  
I 4.445159 -1.705380 1.095675  
Na 5.006527 1.088378 0.360386  
Br -1.843687 2.195003 -1.604882  
Na 0.452641 1.013975 -2.553345  
I 0.637981 -1.918996 -1.772238  
Na 3.241653 -3.144508 -1.196729  
H -6.838004 -2.837231 0.943594  
H -8.775678 -2.699508 -0.394239  
H -7.981258 -1.814476 -1.673883  
H -9.599522 -0.611690 0.279523  
H -8.440886 0.239317 -0.722159  
H -6.165515 -3.022950 -0.666628  
C -7.737097 -0.192141 1.237486  
H -7.977117 0.800551 1.608920  
H -7.864369 -0.907541 2.053261

Vc

E = -5085.531531  
Na -3.384948 3.383072 -0.853125  
Na -2.747638 0.912270 1.476708  
I -4.034670 0.547323 -1.296641  
Na 0.501897 0.284305 2.716968  
I -1.560513 -1.925502 1.949185  
Na -2.032945 -1.719806 -1.191415  
I 0.703235 -2.556499 -2.162999  
Na 1.091469 -3.002110 0.807392  
I 3.057019 -0.787879 1.540816  
Na 2.826033 -0.543945 -1.475426  
Br 3.414435 2.270191 -2.079765  
C 3.093346 3.077439 -0.282668  
C 1.625127 3.380403 -0.070641  
C 1.363443 3.933307 1.337001  
C -0.113351 4.261520 1.579838  
C -1.053086 3.065588 1.526910  
O -0.726668 1.997005 2.114739  
O -2.153312 3.181840 0.913512  
H -0.223361 4.695660 2.578471  
H -0.463900 5.012776 0.871419  
H 1.947636 4.844093 1.490204  
H 1.706520 3.216361 2.086394  
H 1.043271 2.467086 -0.218953  
H 1.287906 4.099945 -0.821044



H 3.483147 2.345656 0.419187  
H 3.719162 3.965272 -0.283798

#### Vd

E = -5085.529285  
C 4.134324 2.597827 -0.384915  
C 3.358849 3.796540 -0.893932  
C 1.843489 3.614490 -1.030145  
C 1.434172 2.616524 -2.112774  
C -0.031572 2.205341 -2.111072  
O -0.344592 1.147182 -2.727784  
Br 3.641951 2.128773 1.503624  
O -0.886509 2.904573 -1.502739  
Na 2.587866 -0.621763 1.475485  
I 2.687536 -1.900130 -1.254862  
Na 0.353864 -0.931197 -2.909527  
I -2.117654 -2.103615 -1.417926  
Na 0.301760 -3.253438 0.101885  
I 0.130777 -1.788443 2.746453  
Na -2.451541 -0.851672 1.471474  
I -3.817539 1.763706 0.830534  
Na -2.498536 1.029642 -1.854441  
H 2.017252 1.695486 -2.046193  
H 1.644996 3.025842 -3.106544  
H 1.439799 3.297012 -0.065128  
H 1.397738 4.586839 -1.247625  
H 3.963811 1.682355 -0.942898  
H 5.199477 2.793990 -0.319112  
H 3.792642 4.037030 -1.872792  
H 3.568970 4.654272 -0.252152  
Na -1.919333 3.885813 0.110057

#### Vla

E = -5383.958947  
Na -1.015710 3.346537 0.346405  
I -2.853013 1.814818 2.145093  
I -1.539082 2.113086 -2.356895  
Na -3.729719 0.900574 -0.603552  
Na -0.845583 -0.811850 -2.563859  
I -2.954535 -2.085834 -0.608531  
I 1.548042 -2.571787 -2.145306  
Na -1.859528 -1.032973 2.188161  
Na -0.411459 -3.793310 -0.171907  
I 0.625886 -2.713455 2.462513  
Na 2.787242 -1.870218 0.524031  
C 2.784150 3.333153 -0.670397  
C 3.929619 2.641367 0.039847  
C 4.744777 1.780936 -0.936381  
C 5.958320 1.121818 -0.281560  
C 5.636671 0.027090 0.700817  
H 4.109750 1.013482 -1.384755  
H 5.108201 2.403068 -1.757468  
H 3.537125 2.020943 0.848324

H 4.577310 3.391612 0.499688  
H 6.586371 0.651497 -1.046350  
H 6.598221 1.852258 0.216360  
O 6.635204 -0.199761 1.548466  
O 4.604352 -0.619690 0.725572  
H 6.404570 -0.939561 2.134677  
H 2.078537 2.643842 -1.125912  
Br 1.703515 4.411320 0.613475  
H 3.114786 4.057842 -1.408791

#### Vlb

E = -5383.957795  
I 1.728861 2.256857 2.580256  
Na -0.496974 3.332662 0.833481  
I 0.754791 3.156712 -1.931636  
Na 3.080449 2.448922 -0.122499  
I 3.559787 -0.542205 -0.804722  
Na 1.073378 0.247559 -2.556860  
Na 2.221773 -0.667232 2.079854  
I -0.567434 -2.288891 -2.444057  
Na 1.930493 -3.153247 -0.889983  
I 0.839570 -3.347483 1.927067  
Na -1.627328 -2.913235 0.303864  
Br -4.256702 -1.779953 0.937178  
C -4.924997 -0.892484 -0.731298  
C -5.930557 0.197018 -0.418731  
C -5.424302 1.396139 0.387034  
C -4.360303 2.230347 -0.349418  
C -3.860949 3.384904 0.475070  
O -4.817779 4.257041 0.779669  
O -2.710197 3.532579 0.845338  
H -4.027874 -0.544436 -1.233940  
H -5.367793 -1.705804 -1.296668  
H -6.783585 -0.243559 0.100697  
H -6.310139 0.539904 -1.389419  
H -6.275352 2.036872 0.618980  
H -5.023676 1.050684 1.343126  
H -4.788846 2.640364 -1.268532  
H -3.491402 1.632607 -0.619412  
H -4.441482 4.974993 1.315481

#### Vlc

E = -5383.957542  
C 5.527978 2.009475 0.185098  
Br 5.836185 0.152639 -0.494302  
C 5.198159 2.994496 -0.919745  
C 3.957339 2.678671 -1.758253  
C 2.637147 2.703870 -0.960544  
C 1.538085 1.881661 -1.568392  
O 1.901792 0.596908 -1.760035  
O 0.423543 2.267632 -1.839971  
Na 3.103912 -1.026780 -0.390022  
Na -1.785074 2.599366 -1.618635

Na -2.119233 -2.074534 -1.456673  
Na -0.886767 0.647881 2.547610  
I -3.591543 0.319104 -2.464183  
I 1.942848 -0.444152 2.372664  
Na 0.285591 -2.824670 1.480707  
I -2.612022 -1.855623 1.652716  
I -2.440430 2.893844 1.335120  
Na -4.206799 0.591184 0.484753  
H 2.784875 2.287119 0.041870  
H 3.890275 3.402404 -2.571983  
H 4.092266 1.703361 -2.225822  
H 6.056580 3.085441 -1.587548  
H 5.086155 3.969870 -0.430328  
H 2.265276 3.718753 -0.833520  
H 6.463105 2.252118 0.679499  
H 4.748822 1.895010 0.933062  
H 1.157018 0.069438 -2.110361  
I 0.835605 -2.824270 -1.522512

Vld

E = -5383.954486  
C -3.609910 3.667085 -0.994815  
Br -2.229915 4.019154 0.406256  
C -4.895263 3.111858 -0.412270  
C -4.794153 1.741206 0.261458  
C -4.485751 0.600627 -0.707951  
C -4.085942 -0.678670 -0.032185  
O -4.028893 -1.728942 -0.878441  
O -3.795378 -0.799559 1.138670  
Na -2.177598 -1.843530 2.351013  
Na -2.048696 -2.318137 -2.376302  
Na 0.021001 2.051612 0.286540  
I -1.572332 -3.956644 0.137681  
Na 0.946555 -2.117641 0.101564  
I -0.244170 0.040027 -2.204753  
Na 2.941085 0.616737 -2.040362  
I 3.864470 -1.704159 -0.362065  
Na 3.373790 0.476237 1.679597  
I 0.329710 -0.158003 2.505805  
H -5.300701 3.830020 0.302263  
H -5.736994 1.530687 0.769343  
H -4.031887 1.774508 1.040546  
H -5.327162 0.389334 -1.372719  
H -3.645259 0.848439 -1.367597  
H -5.612601 3.071960 -1.241633  
H -3.757396 4.640774 -1.450825  
H -3.118789 3.008720 -1.705393  
H -3.713333 -2.513225 -0.368951  
I 2.876925 2.888320 -0.069381

Br(CH<sub>2</sub>)<sub>3</sub>COO-, LM1

E = -2880.778358  
C 0.358046 0.003150 -0.477459

O -2.174569 -1.309724 0.395235  
C -2.742248 -0.255138 0.020593  
C -1.865891 1.046227 0.018899  
C -0.409928 0.884576 0.478762  
O -3.918912 -0.083956 -0.355351  
Br 2.312493 -0.109414 -0.009140  
H -1.904497 1.471446 -0.990528  
H -2.365351 1.774016 0.666090  
H -0.394932 0.426121 1.468907  
H 0.075853 1.863696 0.550498  
H 0.365903 0.387726 -1.494569  
H -0.006239 -1.016963 -0.444322

Br(CH<sub>2</sub>)<sub>3</sub>COO-, TS

E = -2880.771686  
C 0.026281 -0.432988 0.025885  
O -2.011319 -1.219032 0.097586  
C -2.749310 -0.186589 -0.038306  
C -1.924206 1.102898 -0.217406  
C -0.531602 0.918110 0.390080  
O -3.983110 -0.139400 -0.062488  
Br 2.387468 -0.044026 -0.041283  
H -1.842324 1.289440 -1.294801  
H -2.446569 1.960107 0.211946  
H -0.581061 0.995645 1.478751  
H 0.144322 1.699877 0.044682  
H 0.019334 -0.749727 -1.000512  
H 0.173355 -1.195564 0.762531

Br(CH<sub>2</sub>)<sub>3</sub>COO-, LM2

E = -2880.809565  
C -1.090814 -1.419490 -0.333195  
O -2.222548 -0.649237 -0.834136  
C -2.361923 0.494438 -0.119527  
C -1.301735 0.537315 0.960677  
C -0.857114 -0.918171 1.089371  
O -3.225475 1.296064 -0.366264  
Br 2.350716 0.190649 -0.121237  
H -0.456402 1.133061 0.595543  
H -1.693431 0.998140 1.865723  
H -1.481773 -1.462427 1.804424  
H 0.195915 -1.000917 1.356735  
H -0.218950 -1.208625 -0.954813  
H -1.366708 -2.471116 -0.405076

Br(CH<sub>2</sub>)<sub>3</sub>COO-.Na, LM1

E = -3043.090958  
c -0.844624 1.429155 0.535002  
o 1.667392 -0.459351 1.177434  
br -1.644881 -0.307663 -0.083752  
c 0.228762 1.992295 -0.389586  
c 1.672022 1.601170 -0.024868  
c 1.805013 0.084201 0.043656

o 1.917119 -0.547673 -1.042065  
na 0.862078 -2.173199 0.031865  
h 2.344659 1.997583 -0.786187  
h 1.937855 2.029973 0.942395  
h 0.139983 3.082941 -0.338635  
h 0.016320 1.715066 -1.423045  
h -0.471916 1.198199 1.527992  
h -1.722055 2.064884 0.590120

Br(CH<sub>2</sub>)<sub>3</sub>COO.Na, TS

E = -3043.043833

c -0.423768 -1.757677 0.679218  
o -1.035844 0.446146 1.098122  
br 1.876177 -0.195455 -0.147818  
c -1.362700 -1.764540 -0.451360  
c -2.476774 -0.720475 -0.344245  
c -1.795309 0.579038 0.082797  
o -1.903987 1.629296 -0.574231  
na 0.295308 2.014638 0.148748  
h -3.008930 -0.598548 -1.284906  
h -3.194221 -1.002450 0.429902  
h -1.779970 -2.788841 -0.450340  
h -0.813324 -1.666877 -1.388344  
h -0.789614 -1.667662 1.688829  
h 0.541427 -2.217344 0.552670

Br(CH<sub>2</sub>)<sub>3</sub>COO.Na, LM2

E = -3043.118364

c -3.554620 -0.577861 0.239437  
o -2.910829 0.718506 0.381266  
br 2.457604 -0.525616 0.082534  
c -2.414674 -1.570451 -0.001826  
c -1.340037 -0.688648 -0.639931  
c -1.672550 0.690043 -0.121641  
o -0.975754 1.683926 -0.124926  
na 1.258061 1.755477 -0.047862  
h -0.306949 -0.950550 -0.398675  
h -1.420989 -0.657461 -1.731128  
h -2.723560 -2.403840 -0.629946  
h -2.055249 -1.975831 0.944598  
h -4.243180 -0.510366 -0.604873  
h -4.120926 -0.753613 1.150852

Br(CH<sub>2</sub>)COOH.Br(CH<sub>2</sub>)<sub>3</sub>COO-, LM1

E = -5683.537609

C -3.406961 0.397762 -0.274462  
O -0.360046 0.140043 -0.088166  
Br -4.965671 -0.843171 -0.412197  
C -2.880708 0.490792 1.141340  
C -1.772987 1.542958 1.259779  
C -0.460449 1.220515 0.513949  
O 0.422211 2.130614 0.608967  
O 2.490718 2.168272 -0.815497

C 3.325518 1.151528 -0.771120  
C 2.870288 0.063777 0.200617  
Br 4.072818 -1.486780 0.284001  
O 4.341836 1.098727 -1.423524  
H -2.662102 -0.002287 -0.952321  
H -2.122399 2.520224 0.911799  
H -3.700133 0.745327 1.819586  
H -2.490180 -0.482869 1.440247  
H -3.793310 1.345581 -0.641410  
H -1.516766 1.682074 2.314059  
H 1.626633 2.072732 -0.222440  
H 2.822419 0.463445 1.210014  
H 1.879758 -0.301156 -0.067553

Br(CH<sub>2</sub>)COOH.Br(CH<sub>2</sub>)<sub>3</sub>COO-, TS

E = -5683.516779

C -2.499469 0.065003 -0.157780  
O -0.575712 0.625057 -0.276448  
Br -4.828268 -0.984772 -0.354863  
C -2.731966 0.924734 1.056577  
C -1.822483 2.153418 0.980038  
C -0.498491 1.715654 0.372329  
O 0.528738 2.408313 0.514000  
O 2.706489 2.153208 -0.864491  
C 3.389338 1.022108 -0.754919  
C 2.714779 0.013703 0.172335  
Br 3.710542 -1.657963 0.381066  
O 4.429761 0.833874 -1.330864  
H -2.181314 -0.954832 -0.084738  
H -2.247574 2.912380 0.314568  
H -3.779367 1.211176 1.107485  
H -2.511490 0.341509 1.952341  
H -2.689043 0.452087 -1.141515  
H -1.666705 2.631898 1.947085  
H 1.841095 2.176282 -0.331024  
H 2.605752 0.435822 1.167736  
H 1.724609 -0.241899 -0.198105

Br(CH<sub>2</sub>)COOH.Br(CH<sub>2</sub>)<sub>3</sub>COO-, LM2

E = -5683.538979

C -1.712967 -1.329123 -0.562795  
O -0.654094 -0.340272 -0.317127  
Br -5.079283 0.193064 -0.471894  
C -2.310639 -1.610679 0.812027  
C -2.107557 -0.262039 1.504679  
C -0.874837 0.283323 0.845861  
O -0.124208 1.154320 1.247868  
O 1.959122 2.362902 0.066587  
C 3.016693 1.594882 -0.192344  
C 2.780878 0.126080 0.151108  
Br 4.325893 -1.020135 -0.184715  
O 4.034814 2.039010 -0.647312  
H -1.234736 -2.180310 -1.043345

H -2.954945 0.388772 1.235770  
H -3.368134 -1.855710 0.723878  
H -1.769305 -2.411777 1.323142  
H -2.456424 -0.869408 -1.214871  
H -1.998332 -0.285282 2.586965  
H 1.184429 1.867396 0.448497  
H 2.535852 0.021860 1.204764  
H 1.955730 -0.270371 -0.434813

Br(CH<sub>2</sub>)<sub>4</sub>COO-, LM1

E = -2920.075908

O -2.115936 -0.975195 1.063993  
C 0.529869 -0.062338 0.308183  
C 0.077088 1.334953 -0.056330  
C -1.384017 1.638455 0.326270  
C -2.447531 0.861210 -0.449072  
O -3.478404 -1.264993 -0.714018  
Br 2.501451 -0.280485 -0.107392  
H 0.452702 -0.282506 1.365194  
H 0.051341 -0.852828 -0.252771  
H 0.731600 2.054545 0.445007  
H 0.210909 1.487517 -1.132159  
H -1.523486 1.439960 1.391710  
H -1.526666 2.716130 0.172015  
H -3.409882 1.376774 -0.360262  
H -2.218888 0.847127 -1.520636  
C -2.702690 -0.613651 0.012752

Br(CH<sub>2</sub>)<sub>4</sub>COO-, TS

E = -2920.066826

O -1.724432 -1.178201 0.292810  
C 0.240226 -0.302815 0.115625  
C -0.125701 1.119983 -0.188835  
C -1.472514 1.581839 0.391761  
C -2.695349 0.938947 -0.250726  
O -3.915287 -1.108368 -0.162923  
Br 2.698299 -0.176282 -0.036171  
H 0.327440 -0.627616 1.134185  
H 0.279973 -1.055324 -0.642555  
H 0.656813 1.759545 0.219125  
H -0.119083 1.272453 -1.271517  
H -1.481886 1.388209 1.469323  
H -1.523107 2.670341 0.270468  
H -3.616346 1.394173 0.121321  
H -2.683647 1.113240 -1.333654  
C -2.807138 -0.580057 -0.024458

Br(CH<sub>2</sub>)<sub>4</sub>COO-, TS, decarboxylation

E = -2920.012087

C -0.097531 0.201291 -0.162120  
C -2.154537 0.981326 -0.554209  
C -1.439885 2.053832 0.244589  
C 0.018934 1.697722 -0.036366

C -2.535094 -1.055029 0.102545  
O -2.649915 -1.002792 1.287724  
O -2.646106 -1.660071 -0.916399  
Br 2.493650 -0.353246 0.022551  
H -0.210146 -0.388533 0.729581  
H 0.006752 -0.320850 -1.093217  
H 0.729402 1.987407 0.736077  
H 0.362440 2.125078 -0.980332  
H -1.648214 1.904723 1.309218  
H -1.712102 3.094117 0.007190  
H -3.238355 0.966213 -0.410726  
H -1.950669 1.023500 -1.624310

Br(CH<sub>2</sub>)<sub>4</sub>COO-, LM2

E = -2920.104166

O -2.040812 -1.189749 -0.249870  
C -0.724314 -0.961751 -0.849747  
C -0.528578 0.447690 -1.356592  
C -0.810975 1.416622 -0.216359  
C -2.236694 1.211049 0.293869  
O -3.733505 -0.517840 0.982605  
Br 2.734262 -0.084795 0.264613  
H 0.039698 -1.185795 -0.102454  
H -0.666007 -1.702944 -1.645864  
H 0.514900 0.532759 -1.666389  
H -1.181034 0.646869 -2.216303  
H -0.073017 1.227531 0.567425  
H -0.674971 2.453555 -0.533582  
H -2.400530 1.660011 1.274615  
H -2.955053 1.692170 -0.380634  
C -2.717541 -0.229548 0.392138

Br(CH<sub>2</sub>)<sub>4</sub>COO.Na, LM1

E = -3082.393305

c -0.898720 1.089160 0.956378  
o 1.589871 -0.771927 1.238218  
br -1.766594 -0.310641 -0.200847  
na 0.541913 -2.359808 0.076285  
o 1.953128 -1.003893 -0.950578  
c 1.910176 -0.310944 0.102062  
c 2.145063 1.191655 -0.044140  
c 0.946591 1.879738 -0.729036  
c -0.252295 2.210855 0.170147  
h -0.190135 0.521184 1.550442  
h -1.727621 1.444453 1.560967  
h -1.011852 2.726945 -0.423081  
h 0.071495 2.927182 0.938092  
h 1.283723 2.826389 -1.159485  
h 0.624894 1.260898 -1.569615  
h 2.344401 1.636938 0.932611  
h 3.025951 1.330111 -0.672998

Br(CH<sub>2</sub>)<sub>4</sub>COO.Na, TS

E = -3082.339751  
c -0.212372 -1.554944 1.212944  
o -0.939140 0.727955 1.167998  
br 1.925935 -0.211868 -0.237580  
na 0.578372 2.123955 0.206154  
o -1.605926 2.006180 -0.513589  
c -1.668504 0.947083 0.141699  
c -2.544193 -0.199337 -0.342405  
c -1.672838 -1.316685 -0.929487  
c -0.902118 -2.199573 0.089626  
h -0.787686 -1.146785 2.023404  
h 0.819373 -1.787794 1.414639  
h -0.202396 -2.821239 -0.468144  
h -1.648921 -2.851219 0.574944  
h -2.292138 -1.992141 -1.522006  
h -0.931751 -0.883766 -1.603672  
h -3.159058 -0.576716 0.479425  
h -3.206550 0.179184 -1.120496

Br(CH<sub>2</sub>)<sub>4</sub>COO.Na, LM2

E = -3082.413617  
c -1.348795 -0.974066 1.325862  
o -1.048844 0.421699 1.022113  
br 2.392888 -0.404505 -0.186813  
na 0.984281 1.730889 0.230260  
o -1.267070 2.081759 -0.387635  
c -1.687340 1.008330 -0.001372  
c -2.855302 0.259971 -0.571193  
c -2.491345 -1.207173 -0.913517  
c -1.417673 -1.769685 0.037801  
h -2.279022 -1.002564 1.899377  
h -0.525151 -1.293863 1.958219  
h -0.427486 -1.722172 -0.420929  
h -1.613513 -2.816291 0.277486  
h -3.404538 -1.801990 -0.871844  
h -2.130199 -1.255795 -1.940557  
h -3.637136 0.272275 0.195072  
h -3.231100 0.806388 -1.432566

Br(CH<sub>2</sub>)COOH.Br(CH<sub>2</sub>)<sub>4</sub>COO-, LM1

E = -5722.834421  
C 2.690894 -0.116410 0.251202  
O 0.108018 1.369118 0.988060  
Br 3.823422 -1.682845 -0.271340  
C 3.518740 1.151746 0.278591  
C 2.745843 2.390940 0.763800  
C 1.612071 2.865090 -0.145544  
C 0.254480 2.153137 0.035896  
O -0.617305 2.470415 -0.833498  
O -3.082782 2.159695 -0.479709  
C -3.575396 0.964935 -0.228889  
O -4.749671 0.761880 -0.026132  
C -2.504269 -0.124232 -0.242655

Br -3.180589 -1.913880 0.199653  
H -1.705458 0.109962 0.459995  
H -2.070630 -0.203058 -1.236267  
H -2.037948 2.210050 -0.591308  
H 1.893121 2.799059 -1.201273  
H 1.414395 3.926083 0.036154  
H 3.481100 3.196112 0.869692  
H 2.334784 2.197467 1.757173  
H 3.920674 1.340348 -0.721749  
H 4.378594 0.993050 0.935322  
H 2.278509 -0.378741 1.218500  
H 1.893432 -0.105071 -0.481391

Br(CH<sub>2</sub>)COOH.Br(CH<sub>2</sub>)<sub>4</sub>COO-, TS

E = -5722.811009  
C 2.359468 0.064955 0.066501  
O 0.545059 0.926470 0.203011  
Br 4.319596 -1.627913 0.423735  
C 2.996158 0.968123 -0.942662  
C 2.764713 2.455276 -0.650954  
C 1.334064 2.910128 -0.913645  
C 0.263801 2.099813 -0.192602  
O -0.859351 2.630857 -0.053750  
O -2.801268 1.780061 1.429347  
C -3.393563 0.647848 1.076951  
O -4.348567 0.204550 1.660870  
C -2.733055 -0.009369 -0.133206  
Br -3.610910 -1.657940 -0.716125  
H -1.696450 -0.253044 0.087198  
H -2.748414 0.668230 -0.982390  
H -2.010708 2.037649 0.843613  
H 1.110298 2.834978 -1.984140  
H 1.189413 3.958134 -0.646394  
H 3.447100 3.044022 -1.270540  
H 3.037209 2.661764 0.389127  
H 2.629407 0.716020 -1.941665  
H 4.065098 0.764428 -0.938816  
H 2.497471 0.243232 1.115672  
H 1.839064 -0.826681 -0.216108

Br(CH<sub>2</sub>)COOH.Br(CH<sub>2</sub>)<sub>4</sub>COO-, LM2

E = -5722.833183  
C 1.672248 -0.912390 0.050043  
O 0.549695 0.037177 -0.086236  
Br 5.102956 -0.250186 0.984206  
C 2.340273 -1.213047 -1.269523  
C 2.780829 0.100091 -1.905312  
C 1.574781 1.018131 -2.099153  
C 0.533533 0.988259 -1.002072  
O -0.378924 1.805269 -0.987106  
O -2.358441 2.265596 0.755282  
C -3.311229 1.336468 0.822120  
O -4.299839 1.478592 1.487618

C -2.997920 0.105974 -0.026012  
Br -4.396395 -1.255777 0.012626  
H -2.082070 -0.365570 0.320757  
H -2.865033 0.391101 -1.066192  
H -1.603267 2.023739 0.152536  
H 1.018142 0.747051 -3.004185  
H 1.859948 2.063211 -2.228895  
H 3.269877 -0.070222 -2.866877  
H 3.522767 0.550733 -1.240175  
H 1.668933 -1.776193 -1.929592  
H 3.215495 -1.826041 -1.047622  
H 2.399571 -0.476188 0.739482  
H 1.210983 -1.786907 0.504628

Br(CH<sub>2</sub>)<sub>7</sub>COO-, LM1

E = -3037.974714

O 1.438084 -1.446841 -1.248815  
C -1.256734 -0.000371 -0.173283  
Br -3.238578 -0.181315 0.091414  
C -0.879702 1.461278 -0.324287  
C 0.631523 1.650722 -0.548424  
C 1.473445 1.469040 0.718184  
C 2.990045 1.500904 0.482421  
C 3.573068 0.355183 -0.363016  
C 3.305827 -1.052178 0.183211  
C 1.852066 -1.564517 -0.068342  
O 1.239488 -2.025935 0.921860  
H 3.524808 -1.103644 1.253915  
H 3.977407 -1.754953 -0.322839  
H 3.177966 0.393396 -1.381186  
H 4.654774 0.525578 -0.440648  
H 3.484987 1.492857 1.461501  
H 3.260805 2.457489 0.014488  
H 1.213719 0.526188 1.202680  
H 1.214604 2.264475 1.429538  
H 0.962036 0.939617 -1.307690  
H 0.796564 2.659934 -0.946723  
H -1.201381 2.021201 0.560206  
H -1.426758 1.878659 -1.174507  
H -0.816288 -0.501434 0.682658  
H -1.030835 -0.591500 -1.054043

Br(CH<sub>2</sub>)<sub>7</sub>COO-, TS

E = -3037.952604

O 1.015221 -0.898976 -0.948030  
C -0.878249 -0.197195 -0.374101  
Br -3.386200 -0.089452 0.067816  
C -0.617794 1.282593 -0.181320  
C 0.830885 1.788502 -0.337240  
C 1.760217 1.421542 0.831639  
C 3.246859 1.287004 0.465837  
C 3.607383 0.173913 -0.534156  
C 3.211400 -1.243891 -0.108650

C 1.685008 -1.478044 -0.021746  
O 1.239007 -2.156004 0.907858  
H 3.645008 -1.505241 0.860091  
H 3.608568 -1.957733 -0.838829  
H 3.144597 0.380471 -1.500838  
H 4.692018 0.208592 -0.694500  
H 3.812977 1.121680 1.390809  
H 3.605202 2.242028 0.060062  
H 1.423574 0.494907 1.296661  
H 1.667229 2.186384 1.611739  
H 1.235997 1.413360 -1.274077  
H 0.780503 2.880635 -0.423253  
H -0.983314 1.557709 0.810058  
H -1.248308 1.816225 -0.893450  
H -0.812764 -0.898874 0.435774  
H -1.162344 -0.576035 -1.334002

Br(CH<sub>2</sub>)<sub>7</sub>COO-, LM2

E = -3037.986867

O 0.982735 -1.057939 -0.526883  
C -0.153016 -1.192821 0.379088  
Br -3.596261 0.065335 -0.292654  
C -0.214334 -0.026621 1.367080  
C 0.343920 1.300295 0.815893  
C 1.871558 1.485389 1.021516  
C 2.719901 1.858758 -0.206895  
C 2.794512 0.843551 -1.360507  
C 3.229679 -0.578291 -0.970498  
C 2.217775 -1.311579 -0.102842  
O 2.505322 -2.010323 0.842393  
H 4.180927 -0.584602 -0.435087  
H 3.369534 -1.170368 -1.880987  
H 1.829639 0.780267 -1.863521  
H 3.505225 1.227763 -2.099910  
H 3.740660 2.058124 0.143134  
H 2.354565 2.805460 -0.620482  
H 2.292326 0.587239 1.479694  
H 2.033013 2.272457 1.765530  
H 0.074815 1.386402 -0.238315  
H -0.180523 2.117750 1.314270  
H 0.305244 -0.277793 2.297302  
H -1.277304 0.096467 1.589262  
H -0.097314 -2.157472 0.882135  
H -1.026114 -1.154395 -0.271239

Br(CH<sub>2</sub>)<sub>7</sub>COO.Na, LM1

E = -3200.292668

c -1.268265 -1.026571 0.752476  
o 0.850890 1.341985 1.031482  
br -2.764472 0.058136 -0.044585  
c 1.667323 1.578418 0.088725  
o 1.356535 2.215982 -0.954566  
c 3.100050 1.071887 0.244038

c 3.241135 -0.396486 0.676248  
c 2.991308 -1.426717 -0.437084  
c 1.530008 -1.594408 -0.874275  
c 0.670657 -2.454081 0.065692  
c -0.837951 -2.194147 -0.122789  
na -0.751142 2.270826 -0.235151  
h -0.481345 -0.291790 0.904079  
h -1.669807 -1.338004 1.711954  
h -1.030363 -1.977365 -1.175137  
h -1.429405 -3.077241 0.126561  
h 0.883271 -3.511207 -0.115030  
h 0.943251 -2.267343 1.109074  
h 1.500895 -2.051164 -1.868569  
h 1.075268 -0.609408 -0.995118  
h 3.589651 -1.141850 -1.308329  
h 3.376995 -2.400341 -0.114180  
h 2.579719 -0.576024 1.527540  
h 4.260823 -0.543012 1.043907  
h 3.556254 1.702965 1.013465  
h 3.638876 1.256830 -0.686592

Br(CH<sub>2</sub>)<sub>7</sub>COO.Na, TS

E = -3200.251104

c -0.590316 -0.552318 0.676707  
o 1.143226 0.589279 1.308604  
br -3.016436 -0.318412 -0.171786  
c 1.410972 1.403121 0.378573  
o 0.555001 2.100737 -0.232974  
c 2.875833 1.506861 -0.047113  
c 3.679215 0.210759 0.121753  
c 3.366513 -0.914270 -0.881899  
c 1.915143 -1.417147 -0.943675  
c 1.400532 -2.089425 0.341014  
c -0.129176 -1.963941 0.564029  
na -1.627921 2.084039 -0.279147  
h -0.437013 0.089395 -0.159885  
h -1.000978 -0.156616 1.582203  
h -0.644216 -2.405551 -0.293651  
h -0.421727 -2.531325 1.447602  
h 1.631199 -3.157619 0.314497  
h 1.902771 -1.673029 1.210494  
h 1.831391 -2.124432 -1.774467  
h 1.272110 -0.579793 -1.221899  
h 3.645053 -0.573271 -1.884936  
h 4.027809 -1.758879 -0.659521  
h 3.542902 -0.145565 1.143812  
h 4.741693 0.450924 0.020104  
h 3.326529 2.289219 0.572522  
h 2.906765 1.874562 -1.075131

Br(CH<sub>2</sub>)<sub>7</sub>COO.Na, LM2

E = -3200.299922

c 0.325906 -0.714886 1.530943

o 1.455558 0.200112 1.384345  
br -3.227349 -0.315267 -0.299785  
c 1.343823 1.269233 0.611959  
o 0.287258 1.822469 0.351706  
c 2.671750 1.720357 0.057316  
c 3.565994 0.572178 -0.440666  
c 2.984338 -0.318809 -1.552610  
c 1.729915 -1.153035 -1.223836  
c 1.881500 -2.107041 -0.016467  
c 0.729698 -2.101598 1.004309  
na -1.861937 1.858989 -0.142443  
h -0.528268 -0.320756 0.986692  
h 0.077594 -0.738406 2.590210  
h -0.168633 -2.543340 0.566002  
h 1.018861 -2.742706 1.840001  
h 1.997109 -3.132606 -0.373976  
h 2.805422 -1.877404 0.515881  
h 1.479336 -1.731594 -2.115921  
h 0.869950 -0.494731 -1.085854  
h 2.765976 0.301859 -2.428282  
h 3.781191 -1.001803 -1.864345  
h 3.857859 -0.037994 0.414843  
h 4.488018 1.022603 -0.817492  
h 3.195581 2.262931 0.850892  
h 2.458442 2.440369 -0.733422

Br(CH<sub>2</sub>)COOH.Br(CH<sub>2</sub>)<sub>7</sub>COO-, LM1

E = -5840.730557

C 5.277169 -0.259540 -0.329470  
O -1.422245 0.656836 -0.037170  
Br 7.030581 -1.106253 0.073145  
H 5.507636 0.795444 -0.435855  
H 4.989904 -0.669459 -1.294324  
C 4.246854 -0.540293 0.745265  
H 4.142143 -1.621620 0.860449  
H 4.606079 -0.153482 1.702998  
C 2.875715 0.072561 0.414743  
H 2.152409 -0.304227 1.143196  
H 2.537428 -0.301282 -0.555631  
C 2.835782 1.604208 0.434100  
H 3.251678 1.947832 1.388965  
H 3.490601 2.009853 -0.346596  
C 1.430283 2.191854 0.262565  
H 1.473369 3.266863 0.472520  
H 0.761034 1.753032 1.007082  
C 0.815506 1.986752 -1.123846  
H 1.468867 2.448315 -1.876058  
H 0.762628 0.919884 -1.348921  
C -0.592958 2.563249 -1.245483  
H -0.910470 2.560452 -2.293703  
H -0.622717 3.609604 -0.927939  
C -1.678424 1.793929 -0.462122  
O -2.783265 2.418540 -0.351718

O -4.620552 1.639219 1.152760  
C -5.136486 0.442072 0.985571  
O -6.024554 -0.003809 1.675517  
C -4.497693 -0.310079 -0.181583  
H -3.421510 -0.398472 -0.038078  
H -4.673980 0.225982 -1.110282  
H -3.820048 1.892836 0.503784  
Br -5.211855 -2.120493 -0.455007

Br(CH<sub>2</sub>)COOH.Br(CH<sub>2</sub>)<sub>7</sub>COO-, TS  
E = -5840.685345

C 1.888337 -0.575752 0.122153  
O 0.336911 0.654521 -0.175154  
Br 3.498701 -2.618121 -0.155262  
H 2.319916 -0.331993 -0.825679  
H 1.145099 -1.346790 0.126782  
C 2.476993 -0.080233 1.422748  
H 2.208822 -0.815929 2.181626  
H 3.561904 -0.137288 1.327758  
C 2.109740 1.318500 1.974652  
H 2.332270 1.260954 3.044938  
H 1.037630 1.491868 1.891156  
C 2.889946 2.533715 1.440305  
H 2.827058 3.314353 2.206565  
H 3.953041 2.271819 1.369824  
C 2.441773 3.168687 0.115848  
H 2.965573 4.124316 0.017514  
H 1.380735 3.424336 0.186560  
C 2.701851 2.317634 -1.147518  
H 3.352429 2.866993 -1.833263  
H 3.269228 1.430080 -0.870885  
C 1.440024 1.922544 -1.936990  
H 1.672410 1.089338 -2.608454  
H 1.114023 2.752716 -2.563309  
C 0.228837 1.532640 -1.088755  
O -0.846187 2.124800 -1.334303  
O -2.889898 2.239196 0.245252  
C -3.599285 1.136300 0.440322  
O -4.585753 1.112378 1.130129  
C -3.028294 -0.069211 -0.303040  
H -2.009445 -0.266290 0.021808  
H -3.010915 0.124374 -1.372218  
H -2.077183 2.113759 -0.353918  
Br -4.054779 -1.714528 -0.047953

Br(CH<sub>2</sub>)COOH.Br(CH<sub>2</sub>)<sub>7</sub>COO-, LM2  
E = -5840.715959

C 1.318070 -0.173849 1.144341  
O 0.265617 0.280685 0.243505  
Br 4.137886 -2.147588 -0.057583  
H 2.224503 -0.432432 0.601388  
H 0.947182 -1.104006 1.573019  
C 1.535257 0.865561 2.233906

H 0.711549 0.800561 2.952154  
H 2.441475 0.567722 2.770993  
C 1.641105 2.333511 1.795548  
H 1.677073 2.920556 2.718717  
H 0.711373 2.628296 1.299786  
C 2.837396 2.765924 0.927945  
H 3.000156 3.829677 1.130482  
H 3.744409 2.254150 1.267170  
C 2.722267 2.617660 -0.602305  
H 3.442923 3.316425 -1.036670  
H 1.740776 2.979350 -0.929446  
C 3.023522 1.219713 -1.180024  
H 3.672460 1.329521 -2.050519  
H 3.610863 0.630105 -0.474012  
C 1.834580 0.349580 -1.669833  
H 2.134746 -0.697642 -1.533283  
H 1.658817 0.521365 -2.730313  
C 0.490253 0.576257 -1.032224  
O -0.454568 1.018774 -1.677863  
O -2.725466 2.041611 -0.745299  
C -3.654203 1.197776 -0.297211  
O -4.722938 1.574804 0.099507  
C -3.204445 -0.260076 -0.349090  
H -2.324138 -0.403783 0.272092  
H -2.952769 -0.541123 -1.368420  
H -1.882566 1.595528 -1.043016  
Br -4.558537 -1.523086 0.268862

Br(CH<sub>2</sub>)<sub>10</sub>COO-, LM1

E = -3155.871766  
O 0.944429 -1.751462 -0.882557  
C -1.955759 -0.685701 -0.426178  
Br -3.881555 -0.368060 0.112748  
O 0.880225 -1.531116 1.358254  
C -1.268529 0.575373 -0.889585  
C -1.027681 1.603236 0.217366  
C -0.074467 2.760278 -0.158096  
C 1.357335 2.594944 0.374483  
C 2.214013 1.532764 -0.327890  
C 3.373961 1.055593 0.548469  
C 4.372366 0.104827 -0.123544  
C 3.814607 -1.217613 -0.677986  
C 2.984541 -2.052653 0.310876  
C 1.455613 -1.746223 0.266871  
H 1.876685 3.560498 0.326585  
H 3.082361 -3.110499 0.044532  
H 3.352183 -1.941741 1.334641  
H 4.672999 -1.799803 -1.035047  
H 3.184769 -1.034771 -1.551904  
H 5.153784 -0.128665 0.610896  
H 4.878216 0.637206 -0.940170  
H 3.929447 1.927545 0.920012  
H 2.946163 0.564335 1.427298



H 2.596487 1.941929 -1.272239  
H 1.603359 0.671033 -0.592370  
H 1.289358 2.343307 1.438676  
H -0.476421 3.695636 0.245791  
H -0.053192 2.891223 -1.246980  
H -0.622667 1.074639 1.085107  
H -1.993062 2.012622 0.527272  
H -0.315013 0.205776 -1.277606  
H -1.815294 1.029910 -1.722941  
H -2.034364 -1.430146 -1.209460  
H -1.474591 -1.116254 0.447447

Br(CH<sub>2</sub>)<sub>10</sub>COO-, TS

E = -3155.855177  
O 0.480812 -1.479442 -0.548832  
C -1.451956 -0.660230 -0.350508  
Br -3.949915 -0.306064 -0.009277  
O 0.883446 -1.375137 1.664809  
C -1.058852 0.715108 -0.796068  
C -0.713407 1.658203 0.364532  
C 0.212658 2.838668 -0.002032  
C 1.681732 2.605112 0.385416  
C 2.390625 1.488894 -0.397254  
C 3.521133 0.823220 0.389001  
C 4.263272 -0.289409 -0.362538  
C 3.418944 -1.474047 -0.864152  
C 2.604701 -2.217060 0.208765  
C 1.201219 -1.631227 0.498549  
H 2.245993 3.540036 0.282720  
H 2.434536 -3.242830 -0.132944  
H 3.154004 -2.274187 1.151405  
H 4.109631 -2.178896 -1.340740  
H 2.729945 -1.150510 -1.647135  
H 5.049056 -0.678838 0.296333  
H 4.783170 0.147203 -1.224926  
H 4.253069 1.580950 0.697084  
H 3.096898 0.413832 1.310491  
H 2.775698 1.890275 -1.343396  
H 1.669301 0.720296 -0.665156  
H 1.704456 2.354332 1.451540  
H -0.131598 3.742197 0.511493  
H 0.138230 3.059100 -1.074033  
H -0.239655 1.071493 1.155787  
H -1.651649 2.030038 0.781621  
H -0.203986 0.593440 -1.464171  
H -1.863311 1.136799 -1.400842  
H -1.729961 -1.402092 -1.072845  
H -1.411275 -0.947153 0.682313

Br-

E = -2574.264150 in  
Br 0.000000 0.000000 0.000000

Br(CH<sub>2</sub>)<sub>4</sub>COOH.Br-

E = -5494.918646  
C -1.867759 -1.088858 -0.535791  
Br -3.588697 -0.217946 0.002468  
C -0.782359 -0.974407 0.508413  
C -0.231741 0.426747 0.777270  
C 0.336917 1.107994 -0.482195  
C 1.271482 2.250494 -0.122941  
O 0.924137 3.411671 -0.127349  
O 2.509913 1.907286 0.228795  
H -1.131255 -1.421744 1.443155  
H 0.570210 0.312567 1.508111  
H -0.997286 1.064930 1.226447  
H 0.895244 0.365591 -1.057954  
H -0.464196 1.523974 -1.093849  
H 0.055675 -1.591188 0.156389  
H -2.152597 -2.120346 -0.720125  
H -1.611430 -0.607232 -1.474481  
H 2.685722 0.922080 0.145276  
Br 3.083505 -1.248685 -0.054270

Br(CH<sub>2</sub>)<sub>7</sub>COOH.Br-

C 2.012648 -0.630358 -0.577523  
C 1.042478 -1.427141 0.269961  
C -0.296269 -1.623482 -0.455150  
C -1.348018 -2.273904 0.448918  
C -2.631867 -2.726131 -0.261235  
C -3.491685 -1.643902 -0.930894  
C -4.131554 -0.621481 0.022726  
C -3.189086 0.453732 0.551194  
O -3.059391 0.696605 1.730840  
Br 3.861252 -0.687406 0.172638  
O -2.570230 1.072536 -0.442506  
H -2.361938 -3.462887 -1.027728  
H -4.297825 -2.152653 -1.470302  
H -2.911601 -1.105453 -1.682406  
H -4.928440 -0.097811 -0.515107  
H -4.584968 -1.116270 0.883373  
H -3.255902 -3.262050 0.464170  
H -0.904999 -3.158368 0.922838  
H -1.590704 -1.588642 1.265064  
H -0.135376 -2.253017 -1.340006  
H -0.653160 -0.656386 -0.813424  
H 0.875837 -0.894177 1.208813  
H 1.469405 -2.403345 0.518909  
H 2.126746 -1.037999 -1.579233  
H 1.748372 0.425857 -0.616970  
H -1.800240 1.674868 -0.163030  
Br 0.094230 2.684298 -0.194627

Na<sub>6</sub>I<sub>4</sub>Br+

E = -4739.691856  
Na -1.035013 1.608231 1.739380

I -3.729425 0.714673 0.902443  
Na -2.378564 0.627469 -1.803438  
I -1.244170 -2.165160 -1.859267  
Na 1.111074 -0.822692 -0.613619  
Na -2.264970 -1.933836 0.969523  
I 0.320344 2.304457 -0.973261  
Na 3.300381 2.289022 -0.972625  
I 4.134395 -0.370380 0.027099  
Na 2.977227 -1.158858 2.633293  
Br 0.248225 -0.923799 2.268017

Na4I2Br+

E = -3819.213097  
Br -0.942544 2.596139 0.000000  
Na 0.247129 1.959707 2.403988  
I 0.247129 -1.020564 2.371166  
Na -1.529586 -0.191274 0.000000  
I 0.247129 -1.020564 -2.371166  
Na 1.652912 -2.154054 -0.000000  
Na 0.247129 1.959707 -2.403988

Na2Br+

E = -2898.727159 in  
Na 0.000000 0.000000 2.628404  
Br 0.000000 0.000000 0.000000  
Na 0.000000 0.000000 -2.628404

Na4I3+

E = -1542.826285  
I -1.174132 2.464488 0.081961  
Na 1.637130 2.378747 -0.899836  
I 2.721916 -0.215480 0.082737  
Na -0.000879 -0.001015 1.509038  
I -1.547306 -2.249016 0.081996  
Na 1.241954 -2.605759 -0.900980  
Na -2.880507 0.228064 -0.896838

Na3I2+

E = -1082.578517  
I -2.121345 0.000039 -0.000000  
Na 0.000417 -1.077657 -1.864033  
I 2.121082 0.000035 -0.000000  
Na 0.000417 -1.076513 1.864694  
Na 0.000436 2.153816 -0.000660

Na2I+

E = -622.339758  
Na 0.000000 2.759917 -0.498486  
I 0.000000 0.000000 0.206919  
Na -0.000000 -2.759917 -0.498486

Na6I5+

E = -2463.305631

Na -1.961153 1.155742 1.812029  
I -0.000059 -1.241524 2.389925  
Na -1.960985 -2.147363 0.094905  
I -4.019869 -0.000319 0.000004  
Na -1.961493 0.991134 -1.907178  
I -0.000057 2.691015 -0.119621  
I 0.000106 -1.448739 -2.270351  
Na 1.961606 0.991300 -1.907126  
I 4.019877 -0.000251 0.000114  
Na 1.960937 1.155689 1.811955  
Na 1.961095 -2.147383 0.095071

[Na4I2(Br(CH2)4COO)]+

E = -4165.047709  
C -0.679802 -1.859337 0.358890  
C -1.991578 -1.872245 1.134243  
C -3.213758 -2.327093 0.327487  
C -4.562131 -1.833737 0.858285  
C -4.754689 -0.332289 0.922334  
Br -4.511423 0.577023 -0.850251  
O -0.692282 -1.539865 -0.870150  
O 0.391210 -2.117573 0.974638  
H -2.118991 -0.839858 1.485937  
H -1.854712 -2.473123 2.033065  
H -3.104121 -2.007634 -0.709208  
H -3.235116 -3.418446 0.300180  
H -4.719766 -2.191675 1.883660  
H -5.360487 -2.272497 0.256961  
H -5.768744 -0.059305 1.196084  
H -4.056550 0.180450 1.576507  
Na 1.526778 -2.266712 -1.072422  
Na 1.716928 -0.501704 1.776417  
I 3.979233 -0.684738 -0.313044  
Na 3.062332 2.091059 -0.678389  
I 0.357495 2.069886 0.546675  
Na -1.588581 0.502914 -1.215623

[(CH2)4COO.Br(CH2)4COOH]

E = -3266.444441  
C 2.101224 -1.899250 1.017535  
H 1.997614 -2.948696 1.296915  
C 3.539184 -1.551998 0.686996  
C 3.767040 -0.068195 0.397565  
C 5.240534 0.238164 0.082710  
C 5.463438 1.708544 -0.161059  
O 5.085572 2.078512 -1.409882  
O 5.896813 2.495590 0.639470  
Br -4.849820 1.462866 0.395925  
C -4.225040 -0.224754 -0.421637  
C -2.715879 -0.266727 -0.553784  
C -2.253562 -1.564258 -1.228481  
C -0.735156 -1.662484 -1.362366  
C -0.023517 -1.904110 -0.047608

O 1.295008 -1.651122 -0.157209  
O -0.543389 -2.297858 0.965646  
H 4.153453 -1.860656 1.539009  
H 5.875022 -0.050916 0.920491  
H 3.144489 0.242289 -0.443066  
H 3.455347 0.523690 1.263499  
H 3.863768 -2.154228 -0.167036  
H 5.551101 -0.321751 -0.802047  
H 5.227567 3.036089 -1.476535  
H -4.603674 -1.010605 0.226547  
H -4.728641 -0.274188 -1.383887  
H -2.378036 0.593615 -1.137803  
H -2.264631 -0.183410 0.436372  
H -2.614512 -2.424623 -0.660490  
H -2.693608 -1.632328 -2.227420  
H -0.465912 -2.498964 -2.015416  
H -0.312795 -0.770877 -1.831198  
H 1.715521 -1.295328 1.841271

(CH<sub>2</sub>)<sub>4</sub>OCO

E = -345.817590

C 1.730242 -0.061777 -0.319112  
C 1.121273 1.196158 0.288428  
C -0.350590 1.281907 -0.111080  
C -1.136740 -0.015672 -0.013331  
O -0.460936 -1.189493 -0.037765  
O -2.336690 -0.038531 0.013651  
H 1.650987 2.093072 -0.037863  
H 1.213007 1.154983 1.378412  
H 1.690396 -0.011289 -1.411657  
H 2.780182 -0.175476 -0.038618  
H -0.433362 1.585183 -1.160434  
H -0.898641 2.027143 0.464438  
C 0.965699 -1.274569 0.171499  
H 1.129489 -1.420694 1.243820  
H 1.269631 -2.185010 -0.343597

Br(CH<sub>2</sub>)<sub>4</sub>COOH

E = -2920.613493

C -1.421352 0.974281 0.752734  
Br -2.339036 -0.534520 -0.142683  
C -0.390366 1.648200 -0.133939  
C 0.806393 0.794768 -0.560186  
C 1.673703 0.315423 0.616269  
C 2.897397 -0.433814 0.152042  
O 3.087852 -1.615574 0.269297  
O 3.795406 0.388832 -0.446501  
H -0.888529 2.032857 -1.026673  
H 1.425015 1.386423 -1.237230  
H 0.453905 -0.070931 -1.125377  
H 2.001172 1.177040 1.204985  
H 1.119759 -0.360536 1.265378  
H -0.029261 2.524245 0.420317

H -2.219734 1.658259 1.024583  
H -0.995927 0.546468 1.656033  
H 4.539152 -0.164840 -0.731996

[(CH<sub>2</sub>)<sub>7</sub>COO.Br(CH<sub>2</sub>)<sub>7</sub>COOH-]

E = -3502.245481

C 2.972148 -1.729613 0.832542  
C 1.834639 -2.071174 -0.106926  
C 0.489630 -2.079999 0.630548  
C -0.685326 -2.439739 -0.281689  
C -2.047513 -2.289328 0.396341  
C -3.210933 -2.731529 -0.493433  
C -4.613817 -2.488178 0.101950  
C -5.201056 -1.124483 -0.191092  
O -6.226782 -0.939853 -0.797502  
Br 4.697530 -1.527549 -0.140494  
O -4.445498 -0.120604 0.300350  
O 3.891330 1.865519 -0.869515  
C 2.904516 2.234617 -0.034660  
O 2.546980 1.555454 0.898680  
C 2.329095 3.585876 -0.395198  
C 0.955708 3.842955 0.222989  
C -0.150690 2.972263 -0.375734  
C -1.492578 3.102245 0.344814  
C -2.560349 2.159623 -0.210745  
C -3.877605 2.200168 0.564462  
C -4.922308 1.224940 0.058105  
H 0.162224 1.924758 -0.339360  
H 2.308349 3.673883 -1.483873  
H 0.705066 4.899429 0.091173  
H 1.016439 3.664044 1.298993  
H -0.277267 3.221689 -1.435681  
H 3.054392 4.329972 -0.049284  
H 4.226349 0.990458 -0.589308  
H 3.165608 -2.507783 1.565854  
H 2.833690 -0.769014 1.318793  
H 1.797145 -1.334086 -0.912578  
H 2.015694 -3.042377 -0.575057  
H 0.528794 -2.786572 1.466888  
H 0.319917 -1.092189 1.070561  
H -0.657936 -1.801386 -1.171914  
H -0.562823 -3.467335 -0.642296  
H -1.344884 2.888324 1.409192  
H -1.846721 4.138075 0.288255  
H -2.752877 2.402098 -1.262177  
H -2.171807 1.137598 -0.199330  
H -3.692809 2.003590 1.625135  
H -4.311903 3.203804 0.506612  
H -5.106606 1.343685 -1.011167  
H -5.874890 1.350712 0.575356  
H -2.064431 -2.880286 1.319521  
H -2.189754 -1.248856 0.696570  
H -3.140866 -2.239715 -1.468707

H -3.113305 -3.802550 -0.692099  
H -5.326515 -3.206452 -0.299619  
H -4.581432 -2.625278 1.187105

(CH<sub>2</sub>)<sub>7</sub>OCO

E = -463.706640  
O -0.633642 -0.920271 -0.833006  
C -1.983623 -0.480980 -0.587110  
C -2.005210 0.867443 0.146367  
C -0.796413 1.778334 -0.158486  
C 0.419058 1.547224 0.779910  
C 1.791043 1.299988 0.129296  
C 1.961798 0.044386 -0.743240  
C 1.565323 -1.289372 -0.087480  
C 0.083270 -1.410000 0.199388  
O -0.406277 -1.853746 1.206392  
H 2.090788 -1.457367 0.853370  
H 1.837707 -2.110324 -0.758229  
H 1.401295 0.151941 -1.672340  
H 3.015325 -0.021244 -1.029001  
H 2.529801 1.261815 0.937293  
H 2.062456 2.168422 -0.480305  
H 0.199034 0.726938 1.465957  
H 0.528557 2.422301 1.426120  
H -0.501472 1.654935 -1.203392  
H -1.120261 2.816277 -0.061083  
H -2.062770 0.701009 1.224225  
H -2.935032 1.368123 -0.136981  
H -2.530582 -1.247367 -0.038611  
H -2.406974 -0.385461 -1.586001

Br(CH<sub>2</sub>)<sub>7</sub>COOH

E = -3038.516771  
C 3.233588 -0.774540 -0.000155  
C 2.008570 0.117651 0.000019  
C 0.713349 -0.702612 -0.000126  
C -0.543588 0.168957 0.000044  
C -1.842092 -0.637930 -0.000078  
C -3.094689 0.238269 0.000068  
C -4.381271 -0.579459 -0.000022  
C -5.634268 0.260189 0.000059  
O -5.686637 1.462093 0.000221  
Br 4.914061 0.268253 0.000027  
O -6.748219 -0.513343 -0.000107  
H -4.431187 -1.241725 0.870098  
H -4.431179 -1.241562 -0.870267  
H -3.087376 0.897199 0.872097  
H -3.087411 0.897439 -0.871778  
H -1.857577 -1.297414 0.875417  
H -1.857587 -1.297135 -0.875783  
H -0.526791 0.827613 -0.875086  
H -0.526767 0.827305 0.875404  
H 0.697670 -1.360022 -0.876536

H 0.697681 -1.360348 0.876039  
H 2.033774 0.769799 -0.876643  
H 2.033785 0.769471 0.876924  
H 3.290918 -1.400010 -0.887340  
H 3.290930 -1.400338 0.886798  
H -7.509769 0.087724 -0.000059

[(CH<sub>2</sub>)<sub>3</sub>COO]

E = -306.521586  
C -0.888973 -0.002025 0.002756  
O -2.081508 -0.030318 -0.067992  
O -0.128489 -1.130713 -0.044164  
C 1.269154 -0.821246 0.123539  
C 1.405099 0.668894 -0.208964  
C 0.023143 1.205687 0.160642  
H -0.333631 2.028355 -0.454976  
H -0.030461 1.527243 1.204488  
H 2.221910 1.139250 0.336559  
H 1.591472 0.800381 -1.276019  
H 1.546736 -1.039748 1.158004  
H 1.833407 -1.475091 -0.538639

[(NaI)<sub>2</sub>(CH<sub>2</sub>)<sub>3</sub>COO]

E = -1226.977243  
C -5.118069 0.558477 -0.832689  
C -3.604840 0.356573 -0.930978  
C -3.044081 1.398934 0.009284  
O -4.011592 1.889800 0.792226  
C -5.273186 1.215911 0.542019  
O -1.899571 1.777275 0.108938  
Na 0.173682 0.931324 0.134240  
I 3.134873 1.216937 -0.056855  
I -0.326459 -2.089283 0.099715  
Na 2.532969 -1.609942 -0.054576  
H -6.055314 1.969421 0.593754  
H -5.466833 1.232830 -1.615790  
H -5.684789 -0.367657 -0.907685  
H -5.420055 0.488295 1.341858  
H -3.273906 -0.620829 -0.566917  
H -3.187830 0.481083 -1.928238

[(NaI)<sub>4</sub>(CH<sub>2</sub>)<sub>3</sub>COO]

E = -2147.457760  
C 4.750527 0.401222 0.005127  
O 3.645298 0.880742 -0.059589  
O 4.957600 -0.920002 -0.067556  
C 6.363809 -1.237313 0.096262  
C 7.108877 0.070338 -0.189999  
C 6.067130 1.127052 0.182408  
H 6.505747 -1.587884 1.120026  
H 6.593932 -2.044600 -0.594527  
H 8.032849 0.148098 0.380008  
H 7.358227 0.138687 -1.249532

H 6.085904 2.031001 -0.422325  
H 6.135754 1.431414 1.230667  
Na 1.419338 0.489624 -0.107858  
I 0.297594 -1.050194 2.412021  
Na -1.869420 0.976469 1.826847  
I 0.137880 -1.280204 -2.378581  
Na -1.279299 -2.231552 0.117124  
I -3.858565 -0.598181 0.125757  
Na -1.995811 0.796624 -1.853223  
I -0.620316 2.884933 -0.155834

[Na2I(Br(CH2)3COO)]

E = -3503.361412  
Na 0.444347 -1.166956 -0.099752  
Br 3.133657 -1.686303 0.079872  
Na 3.079833 0.983151 0.057119  
I 0.328143 1.904566 -0.101807  
O -1.722234 -1.745032 -0.081629  
C -2.805060 -1.212603 0.001176  
O -3.824279 -1.578818 -0.784886  
C -4.983544 -0.734725 -0.557609  
C -4.751671 -0.083544 0.809256  
C -3.225987 -0.089408 0.920960  
H -2.838871 -0.255103 1.924270  
H -2.760252 0.827722 0.547457  
H -5.186560 0.912601 0.864985  
H -5.196575 -0.691521 1.597992  
H -5.022397 -0.006144 -1.369039  
H -5.861194 -1.374656 -0.607057

[Na3I2(Br(CH2)3COO)]

E = -3963.595601  
C -5.051771 -0.420125 0.744335  
C -6.401852 -0.864035 0.178965  
C -7.056900 0.469857 -0.189559  
O -5.954620 1.378555 -0.454276  
C -4.817193 0.916089 0.077103  
O -3.785492 1.544030 -0.002333  
Na -1.581373 1.136784 -0.056204  
H -7.667895 0.437841 -1.088336  
H -7.642368 0.893433 0.628570  
H -7.003432 -1.434779 0.883861  
H -6.255635 -1.474613 -0.712671  
H -4.217457 -1.093505 0.550368  
H -5.088324 -0.247030 1.824204  
Br 0.980177 2.221841 0.020655  
Na 3.686621 2.124782 0.029047  
I 4.582883 -0.591573 0.016302  
Na 1.591314 -0.727430 -0.015700  
I -1.171676 -1.799231 -0.083277

[Na4I3(Br(CH2)3COO)]

E = -4423.843840

C 4.747127 0.388817 0.201734  
O 3.634377 0.831428 0.057432  
O 4.967458 -0.827413 0.718609  
C 6.388530 -1.096202 0.832350  
C 7.066018 -0.094966 -0.108626  
C 6.062531 1.059494 -0.132920  
H 6.669727 -0.949605 1.876755  
H 6.541328 -2.138230 0.562695  
H 8.054928 0.192955 0.243302  
H 7.173438 -0.526297 -1.104529  
H 5.987338 1.589446 -1.079810  
H 6.260481 1.802446 0.644969  
Na 1.404155 0.466104 0.146581  
Br 0.045047 -0.158260 2.621879  
Na -1.950070 1.457990 1.525183  
I 0.340041 -1.979045 -1.557801  
Na -1.235998 -2.053994 1.021512  
I -3.836638 -0.617976 0.313784  
Na -1.831048 0.103977 -1.881491  
I -0.596256 2.677748 -0.884328

HI

E = -298.399954  
H 0.000000 0.000000 -1.585028  
I 0.000000 0.000000 0.029906

[(Br(CH2)3COOH)]

E = -2881.313111  
C 1.137126 1.347205 -0.170684  
C -0.266411 1.712765 0.272848  
C -1.391900 1.055608 -0.532934  
C -1.949379 -0.198381 0.103330  
O -2.463006 -1.040639 -0.821446  
Br 1.550089 -0.580102 0.001561  
O -2.001133 -0.420555 1.283968  
H 1.888932 1.847607 0.432582  
H -1.089641 0.837484 -1.557743  
H -2.243271 1.740055 -0.603151  
H -0.338560 2.800541 0.167857  
H -0.403245 1.487471 1.331223  
H 1.307534 1.571872 -1.220798  
H -2.838363 -1.795092 -0.340147

[Na4I4(Br(CH2)3COOH)]

E = -4722.252892  
I 0.079593 -0.942394 2.313325  
Na 2.444615 -1.938023 0.657852  
I 4.339326 0.435605 0.814749  
Na 1.645381 1.594656 1.634780  
Na 2.790220 0.803963 -1.794847  
I 1.489376 -1.902651 -2.198873  
Na -0.753436 -0.250008 -0.797135  
I 0.489563 2.588549 -0.963514

Br -5.523787 1.362943 0.318252  
O -3.344808 -1.797482 1.524553  
C -3.629101 -1.533034 0.257292  
O -2.833722 -1.041398 -0.522130  
C -5.015072 -1.985799 -0.135342  
C -5.683709 -1.133599 -1.218527  
C -6.539533 0.006794 -0.700926  
H -7.308766 -0.337235 -0.013843  
H -7.001941 0.557560 -1.514711  
H -6.354705 -1.771969 -1.802776  
H -4.926275 -0.760019 -1.908542  
H -4.877042 -3.005545 -0.509953  
H -5.631367 -2.067254 0.760143  
H -2.415642 -1.542894 1.727979

[Na<sub>2</sub>I<sub>2</sub>(Br(CH<sub>2</sub>)<sub>3</sub>COOH)]

E = -3801.775540  
I 3.593631 -2.168103 -0.048768  
Na 4.339062 0.617601 0.043276  
I 1.986841 2.353316 -0.116337  
Na 1.080270 -0.603072 -0.161592  
O -1.501098 1.959622 0.546928  
C -1.871114 0.692340 0.454760  
O -1.097012 -0.220913 0.216535  
C -3.350397 0.509721 0.667473  
C -3.785307 -0.948863 0.736970  
C -5.271937 -1.133801 0.968233  
Br -6.371055 -0.487434 -0.546471  
H -5.533141 -2.182484 1.070261  
H -5.634133 -0.583997 1.833505  
H -3.482191 -1.473541 -0.169711  
H -3.268366 -1.444266 1.565863  
H -3.858534 1.028070 -0.151034  
H -3.625108 1.056119 1.573999  
H -0.531883 2.058142 0.383331

[(NaI)<sub>2</sub>((CH<sub>2</sub>)<sub>4</sub>COO)]

E = -1266.261713  
C -0.328919 2.537056 -0.076664  
C -1.713079 3.024971 -0.503628  
C -2.772068 1.980607 -0.868791  
C -3.490532 1.315413 0.312053  
C -2.721158 0.279260 1.107381  
I -2.411523 -1.609097 0.014482  
H -3.262597 -0.051040 1.988482  
H -1.715373 0.585636 1.370276  
O 0.440115 3.367121 0.453384  
O 0.001261 1.329025 -0.312467  
H -2.076942 3.702562 0.272640  
H -1.527412 3.662172 -1.374269  
H -3.538220 2.480050 -1.467364  
H -2.330898 1.217644 -1.513682  
H -3.774385 2.092960 1.034661

H -4.428619 0.874043 -0.032316  
Na 0.586801 -0.720314 -0.660444  
I 3.442506 -0.667151 0.001852  
Na 2.198281 1.964324 0.470120

[Na<sub>2</sub>I(Br(CH<sub>2</sub>)<sub>4</sub>COO)]

E = -3542.644237  
C -0.929555 2.250516 -0.071017  
C -2.388729 2.518522 -0.439931  
C -3.264793 1.326185 -0.835854  
C -3.842643 0.503256 0.322661  
C -2.892907 -0.396789 1.085184  
Br -2.306778 -1.985277 0.010782  
H -3.364823 -0.853751 1.949534  
H -1.965418 0.087303 1.367751  
O -0.276511 3.186960 0.436274  
O -0.428838 1.106781 -0.325475  
H -2.836672 3.085103 0.380581  
H -2.341907 3.221447 -1.277494  
H -4.114873 1.711321 -1.404890  
H -2.713184 0.673630 -1.515330  
H -4.263583 1.188743 1.070344  
H -4.680931 -0.097845 -0.037418  
Na 0.377486 -0.872399 -0.629931  
I 3.210226 -0.449798 0.005448  
Na 1.661712 2.031306 0.407037

[Na<sub>4</sub>I<sub>3</sub>(Br(CH<sub>2</sub>)<sub>4</sub>COO)]

E = -4463.124608  
C -4.034393 -1.090353 0.300598  
Br -4.243594 0.897167 0.307123  
Na -1.307644 1.262810 0.052416  
C -4.534703 -1.720708 -0.982452  
C -3.720644 -1.473206 -2.257829  
C -2.352400 -2.164075 -2.310718  
C -1.136262 -1.377686 -1.827584  
O -0.070929 -2.027344 -1.622448  
Na 1.070610 -2.544869 0.200048  
I 3.667886 -1.180366 -0.408407  
Na 1.200232 0.057901 -1.894255  
I 1.190980 2.861556 -0.523939  
Na 2.312962 0.834267 1.402493  
I -0.189758 -0.705663 2.290778  
O -1.201040 -0.123931 -1.718593  
H -2.113681 -2.412740 -3.349908  
H -2.363719 -3.123564 -1.787562  
H -3.590321 -0.401845 -2.419350  
H -4.322115 -1.840346 -3.092494  
H -4.573208 -2.800928 -0.788526  
H -5.568836 -1.408788 -1.145850  
H -2.980304 -1.258487 0.503561  
H -4.616366 -1.401895 1.162414

Na2I2  
E = -920.431318  
I -0.000000 -2.378999 -0.000016  
Na 1.697220 -0.000000 0.000079  
I 0.000000 2.378999 -0.000016  
Na -1.697220 0.000000 0.000079

[I(CH2)4COOH]  
E = -644.231928  
C -0.865560 1.237940 0.773741  
I -2.053543 -0.378878 -0.089627  
C 0.191966 1.790769 -0.165384  
C 1.317180 0.837695 -0.574037  
C 2.169694 0.345759 0.607821  
C 3.331121 -0.504408 0.157550  
O 3.445251 -1.689692 0.326746  
O 4.269311 0.227997 -0.494224  
H -0.292914 2.173379 -1.066229  
H 1.963548 1.355929 -1.284550  
H 0.895380 -0.023466 -1.098113  
H 2.565740 1.205414 1.155926  
H 1.582036 -0.263483 1.292411  
H 0.630236 2.661721 0.340404  
H -1.603215 1.991058 1.032812  
H -0.454887 0.813718 1.685211  
H 4.968942 -0.386720 -0.765983

[(NaI)2(Br(CH2)4COOH)]  
E = -3841.067859  
Br 1.407597 -2.143990 -1.289907  
C 2.844289 -0.802011 -1.609512  
C 4.014515 -0.956869 -0.654798  
C 3.679867 -0.825267 0.832316  
C 3.223403 0.587322 1.255903  
C 2.292730 0.532242 2.433682  
O 2.764416 1.126649 3.534040  
O 1.201905 -0.004334 2.414637  
H 2.088201 1.051858 4.228127  
H 2.644992 1.063839 0.459044  
H 4.074852 1.228251 1.478019  
H 2.900318 -1.548550 1.075378  
H 4.556369 -1.105655 1.419687  
H 4.750619 -0.195959 -0.943099  
H 4.489959 -1.925514 -0.823829  
H 2.330862 0.153516 -1.537473  
H 3.140352 -0.974052 -2.639707  
Na -0.340472 -0.395546 0.746788  
I -3.276051 -0.982729 0.595186  
Na -2.788605 1.393178 -0.964332  
I -0.004740 2.230408 -0.902948

(CH2)4  
E = -157.162099

C 0.068192 1.080339 0.122602  
C -1.080479 0.068237 -0.122655  
C -0.068250 -1.080290 0.122638  
C 1.080561 -0.068315 -0.122639  
H -0.123559 -1.952981 -0.528608  
H -0.089721 -1.420976 1.159210  
H 1.953270 -0.123074 0.528622  
H 1.421093 -0.089690 -1.159291  
H -1.421128 0.089764 -1.159234  
H -1.953119 0.123294 0.528681  
H 0.089668 1.420644 1.159320  
H 0.123349 1.953197 -0.528379

CO2  
E = -188.658232  
C 0.000000 0.000000 0.000000  
O 0.000000 0.000000 1.159731  
O 0.000000 0.000000 -1.159731
